# Supplementary material for: A Pipeline Integrating Cultural Heritage X-ray CR/CT Data Using Digital Imaging and Communications in Medicine
Source: Research Square preprint supplement (doi:10.21203/rs.3.rs-8413368/v1), 2026-01-16
Supplement: Supplementary file 1 [file CR_TAG_DICOCH_Andong Hahoe Mask.xlsx]

## Sheet: Sheet1
group	element	parenttag	filepath	vr	keyword	value	level	type	description	publicflag	rescaleslope	rescaleintercept	rescaletype	calphantomid
0002	0000			UL	FileMetaInformationGroupLength		0	1	File Meta Information Group Length	Public
0002	0001			OB	File Meta Information Version		0	1	File Meta Information Version	Public
0002	0002			UI	MediaStorageSOPClassUID	1.2.840.10008.5.1.4.1.1.1	0	1	Media Storage SOP Class UID	Public
0002	0003			UI	MediaStorageSOPInstanceUID	1.2.528.1.1001.100.4.11681.8413.66325071390980.20250825013503590	0	1	Media Storage SOP Instance UID	Public
0002	0010			UI	TransferSyntaxUID	1.2.840.10008.1.2.1	0	1	Transfer Syntax UID	Public
0002	0012			UI	ImplementationClassUID	1.2.528.1.1001.2.20060808.1	0	1	Implementation Class UID	Public
0002	0013			SH	ImplementationVersionName	OFFIS_DCMTK_360	0	1	Implementation Version Name	Public
0002	0016			AE	Source Application Entity Title	NRICH_AE	0	1	Source Application Entity Title	Public
0002	0017			AE	Sending Application Entity Title	NRICH_AE	0	2	Sending Application Entity Title	Public
0002	0018			AE	Receiving Application Entity Title	NRICH_AE	0	1	Receiving Application Entity Title	Public
0008	0005			CS	SpecificCharacterSet	ISO_IR 192	0	1C	Specific Character Set	Public
0008	0008			CS	Image Type	ORIGINAL\PRIMARY	0	3	Image Type	Public
0008	0016			UI	SOPClassUID	1.2.840.10008.5.1.4.1.1.1	0	1	SOP Class UID	Public
0008	0018			UI	SOPInstanceUID	1.2.528.1.1001.100.4.11681.8413.66325071390980.20250825013503590	0	1	SOP Instance UID	Public
0008	0020			DA	StudyDate	20210824	0	2	Study Date	Public
0008	0021			DA	SeriesDate	20210824	0	3	Series Date	Public
0008	0023			DA	ContentDate	20210824	0	3	Content Date	Public
0008	0030			TM	StudyTime	131010	0	2	Study Time	Public
0008	0031			TM	SeriesTime	131010	0	3	Series Time	Public
0008	0033			TM	ContentTime	131010	0	3	Content Time	Public
0008	0050			SH	AccessionNumber	2021340103	0	2	Accession Number	Public
0008	0060			CS	Modality	CR	0	1	Modality	Public
0008	0070			LO	Manufacturer	GE Inspection Technologies	0	2	Manufacturer	Public
0008	0080			LO	Institution Name	NRICH	0	3	Institution Name	Public
0008	0090			PN	ReferringPhysicianName	KOREA^Object	0	3	Referring Physician's Name	Public
0008	1030			LO	StudyDescription	X-ray CR scan of Cultural Heritage	0	3	Study Description	Public
0008	103E			LO	SeriesDescription	National Treasure No. 21 Andong Hahoe Mask	0	3	Series Description	Public
0008	1090			LO	Manufacturer’sModelName	CRxVision_Rhythm Review	0	3	Manufacturer's Model Name	Public
0008	2111			ST	DerivationDescription	IPU2021340103; 12361*10131; TIFF	0	3	DerivationDescription	Public
0010	0010			PN	PatientName	KOREAObject^HeritageObject	0	2	Patient's Name	Public
0010	0020			LO	PatientID	OBJ-CR-TEST-HAHOE	0	2	Patient ID	Public
0010	0030			DA	PatientBirthDate	20240824	0	2	Patient's Birth Date	Public
0010	0040			CS	PatientSex	O	0	2	Patient's Sex	Public
0013	0010			LO	PrivateCreator	DICOCH_NRICH by SONG JUNG IL	0	3	_PrivateCreator	Private
0013	0011			LO	PrivateCreator20	HeritageMetadataSequence	0	3	PrivateCreator20	Private
0013	0012			LO	PrivateCreator30	GrayValue-HU_PointSequence	0	3	PrivateCreator30	Private
0013	0013			LO	PrivateCreator40	DICOCH_GrayValue-HU_ROISequence	0	3	PrivateCreator40	Private
0013	0014			LO	PrivateCreator50	HUCalibrationSequence	0	3	PrivateCreator50	Private
0013	0015			LO	PrivateCreator60	IIIFInternationalNormLinkSequence	0	3	PrivateCreator60	Private
0013	0016			LO	PrivateCreator70	SecurityAccessSequence	0	3	PrivateCreator70	Private
0013	0017			LO	PrivateCreator80	DICOCH_X-ray CR Sequence	0	3	PrivateCreator80	Private
0013	0018			LO	PrivateCreator90	DICOCH_X-ray CT Sequence	0	3	PrivateCreator90	Private
0013	0019			LO	PrivateCreator100	DICOCHPrivateTagSequence	0	3	PrivateCreator100	Private
0013	1100			SQ	HeritageMetadataSequence	Heritage Metadata Sequence	0	3	HeritageMetadataSequence	Private
0013	1101			LO	HeritageName	Andong Hahoe Yangban Mask	0	3	HeritageName	Private
0013	1102			LO	HeritageID	KR-AHYM-NT121-YB	0	3	HeritageID	Private
0013	1103			LO	HistoricPeriod	Goryeo Dynasty, 12th–13th	0	3	HistoricPeriod	Private
0013	1104			UT	MaterialComposition	Salix spp.	0	3	MaterialComposition	Private
0013	1105			UT	ConditionStatus	Surface_Crack_3	0	3	ConditionStatus	Private
0013	1106			LO	CulturalSignificance	NationalTreasure NO.121	0	3	CulturalSignificance	Private
0013	1107			UT	InvestigationPurpose	X-ray NONE-destructive Precision Documentation and Internal Structure Analysis	0	3	InvestigationPurpose	Private
0013	1108			UT	Investigator	National Research Institute of Cultural Heritage, NRICH	0	3	Investigator	Private
0013	1109			UT	SiteLocation	132 Munji-ro, Yuseong-gu, Daejeon, South Korea	0	3	SiteLocation	Private
0013	1200			SQ	GrayValue-HU_PointSequence	GrayValue-HU_PointSequence	0	3	GrayValue-HU_PointSequence	Private
0013	1201			LO	GrayValue-HU_1_Label	MASK_1_Point_background	0	3	GrayValue-HU_1_Label	Private
0013	1202			LO	GrayValue-HU_1_Position(x,y)	(x=1721, y=2535)	0	3	GrayValue-HU_1_Position(x,y)	Private
0013	1203			LO	GrayValue_1	20560	0	3	GrayValue_1	Private
0013	1204			LO	HU_1	NONE	0	3	HU_1	Private
0013	1205			LO	GrayValue-HU_2_Label	MASK_2_Point_WoodMask_Brow	0	3	GrayValue-HU_2_Label	Private
0013	1206			LO	GrayValue-HU_2_Position(x,y)	(x=6154, y=3018)	0	3	GrayValue-HU_2_Position(x,y)	Private
0013	1207			LO	GrayValue_2	37522	0	3	GrayValue_2	Private
0013	1208			LO	HU_2	NONE	0	3	HU_2	Private
0013	1209			LO	GrayValue-HU_3_Label	MASK_3_Point_WoodMask_Nose	0	3	GrayValue-HU_3_Label	Private
0013	1210			LO	GrayValue-HU_3_Position(x,y)	(x=5066, y=5384)	0	3	GrayValue-HU_3_Position(x,y)	Private
0013	1211			LO	GrayValue_3	29298	0	3	GrayValue_3	Private
0013	1212			LO	HU_3	NONE	0	3	HU_3	Private
0013	1213			LO	GrayValue-HU_4_Label	MASK_4_Point_WoodMask_Hole around the Jaw	0	3	GrayValue-HU_4_Label	Private
0013	1214			LO	GrayValue-HU_4_Position(x,y)	(x=4670, y=8667)	0	3	GrayValue-HU_4_Position(x,y)	Private
0013	1215			LO	GrayValue_4	1799	0	3	GrayValue_4	Private
0013	1216			LO	HU_4	NONE	0	3	HU_4	Private
0013	1217			LO	GrayValue-HU_5_Label	MASK_5_Point_WoodMask_Jaw	0	3	GrayValue-HU_5_Label	Private
0013	1218			LO	GrayValue-HU_5_Position(x,y)	(x=5164, y=9512)	0	3	GrayValue-HU_5_Position(x,y)	Private
0013	1219			LO	GrayValue_5	36237	0	3	GrayValue_5	Private
0013	1220			LO	HU_5	NONE	0	3	HU_5	Private
0013	1300			SQ	DICOCH_GrayValue-HU_ROISequence	ROI Gray Value Sequence	0	3	DICOCH_GrayValue-HU_ROISequence	Private
0013	1301			LO	GrayValue-HU_1_ROILabel	MASK_1_ROI_background	0	3	GrayValue-HU_1_ROILabel	Private
0013	1302			LO	GrayValue-HU_1_ROIType	Polygon	0	3	GrayValue-HU_1_ROIType	Private
0013	1303			UT	GrayValue-HU_1_ROICoordinates	ROI_point(x=1623, y=2149), ROI_px(W=594, H=797)	0	3	GrayValue-HU_1_ROICoordinates	Private
0013	1304			LO	GrayValueROIMean_1	20083.9	0	3	GrayValueROIMean_1	Private
0013	1305			LO	GrayValueROIMin_1	5654	0	3	GrayValueROIMin_1	Private
0013	1306			LO	GrayValueROIMax_1	41634	0	3	GrayValueROIMax_1	Private
0013	1307			LO	GrayValueROIStdDev_1	3891.91	0	3	GrayValueROIStdDev_1	Private
0013	1308			LO	HUROIMean_1	NONE	0	3	HUROIMean_1	Private
0013	1309			LO	HUROIMin_1	NONE	0	3	HUROIMin_1	Private
0013	1310			UT	HUROIMax_1	NONE	0	3	HUROIMax_1	Private
0013	1311			LO	HUROIStdDev_1	NONE	0	3	HUROIStdDev_1	Private
0013	1312			LO	GrayValue-HU_2_ROILabel	MASK_2_ROI_WoodMask_Brow	0	3	GrayValue-HU_2_ROILabel	Private
0013	1313			LO	GrayValue-HU_2_ROIType	Polygon	0	3	GrayValue-HU_2_ROIType	Private
0013	1314			UT	GrayValue-HU_2_ROICoordinates	ROI_point(x=5916, y=2849), ROI_px(W=336, H=459)	0	3	GrayValue-HU_2_ROICoordinates	Private
0013	1315			LO	GrayValueROIMean_2	33858.6	0	3	GrayValueROIMean_2	Private
0013	1316			LO	GrayValueROIMin_2	13621	0	3	GrayValueROIMin_2	Private
0013	1317			LO	GrayValueROIMax_2	64764	0	3	GrayValueROIMax_2	Private
0013	1318			LO	GrayValueROIStdDev_2	7851.82	0	3	GrayValueROIStdDev_2	Private
0013	1319			LO	HUROIMean_2	NONE	0	3	HUROIMean_2	Private
0013	1320			LO	HUROIMin_2	NONE	0	3	HUROIMin_2	Private
0013	1321			UT	HUROIMax_2	NONE	0	3	HUROIMax_2	Private
0013	1322			LO	HUROIStdDev_2	NONE	0	3	HUROIStdDev_2	Private
0013	1323			LO	GrayValue-HU_3_ROILabel	MASK_3_ROI_WoodMask_Nose	0	3	GrayValue-HU_3_ROILabel	Private
0013	1324			LO	GrayValue-HU_3_ROIType	Polygon	0	3	GrayValue-HU_3_ROIType	Private
0013	1325			UT	GrayValue-HU_3_ROICoordinates	ROI_point(x=4769, y=5311), ROI_px(W=317, H=386)	0	3	GrayValue-HU_3_ROICoordinates	Private
0013	1326			LO	GrayValueROIMean_3	37413.7	0	3	GrayValueROIMean_3	Private
0013	1327			LO	GrayValueROIMin_3	19532	0	3	GrayValueROIMin_3	Private
0013	1328			LO	GrayValueROIMax_3	65021	0	3	GrayValueROIMax_3	Private
0013	1329			LO	GrayValueROIStdDev_3	8561.4	0	3	GrayValueROIStdDev_3	Private
0013	1330			LO	HUROIMean_3	NONE	0	3	HUROIMean_3	Private
0013	1331			LO	HUROIMin_3	NONE	0	3	HUROIMin_3	Private
0013	1332			UT	HUROIMax_3	NONE	0	3	HUROIMax_3	Private
0013	1333			LO	HUROIStdDev_3	NONE	0	3	HUROIStdDev_3	Private
0013	1334			LO	GrayValue-HU_4_ROILabel	MASK_4_ROI_WoodMask_Hole around the Jaw	0	3	GrayValue-HU_4_ROILabel	Private
0013	1335			LO	GrayValue-HU_4_ROIType	Polygon	0	3	GrayValue-HU_4_ROIType	Private
0013	1336			UT	GrayValue-HU_4_ROICoordinates	ROI_point(x=4531, y=8474), ROI_px(W=277, H=362)	0	3	GrayValue-HU_4_ROICoordinates	Private
0013	1337			LO	GrayValueROIMean_4	32878	0	3	GrayValueROIMean_4	Private
0013	1338			LO	GrayValueROIMin_4	257	0	3	GrayValueROIMin_4	Private
0013	1339			LO	GrayValueROIMax_4	65021	0	3	GrayValueROIMax_4	Private
0013	1340			LO	GrayValueROIStdDev_4	15821.2	0	3	GrayValueROIStdDev_4	Private
0013	1341			LO	HUROIMean_4	NONE	0	3	HUROIMean_4	Private
0013	1342			LO	HUROIMin_4	NONE	0	3	HUROIMin_4	Private
0013	1343			UT	HUROIMax_4	NONE	0	3	HUROIMax_4	Private
0013	1344			LO	HUROIStdDev_4	NONE	0	3	HUROIStdDev_4	Private
0013	1345			LO	GrayValue-HU_5_ROILabel	MASK_5_ROI_WoodMask_Jaw	0	3	GrayValue-HU_5_ROILabel	Private
0013	1346			LO	GrayValue-HU_5_ROIType	Polygon	0	3	GrayValue-HU_5_ROIType	Private
0013	1347			UT	GrayValue-HU_5_ROICoordinates	ROI_point(x=4808, y=9343), ROI_px(W=396, H=628)	0	3	GrayValue-HU_5_ROICoordinates	Private
0013	1348			LO	GrayValueROIMean_5	37585	0	3	GrayValueROIMean_5	Private
0013	1349			LO	GrayValueROIMin_5	10023	0	3	GrayValueROIMin_5	Private
0013	1350			LO	GrayValueROIMax_5	63736	0	3	GrayValueROIMax_5	Private
0013	1351			LO	GrayValueROIStdDev_5	9378.91	0	3	GrayValueROIStdDev_5	Private
0013	1352			LO	HUROIMean_5	NONE	0	3	HUROIMean_5	Private
0013	1353			LO	HUROIMin_5	NONE	0	3	HUROIMin_5	Private
0013	1354			UT	HUROIMax_5	NONE	0	3	HUROIMax_5	Private
0013	1355			LO	HUROIStdDev_5	NONE	0	3	HUROIStdDev_5	Private
0013	1400			SQ	HUCalibrationSequence	HUCalibrationSequence	0	3	HUCalibrationSequence	Private
0013	1401			LO	DICOCH-HUCalRef	NONE	0	3	DICOCH-HUCalRef	Private
0013	1402			LO	MassAttenData	NONE	0	3	MassAttenData	Private
0013	1403			UT	MassAttenDataSrc	NONE	0	3	MassAttenDataSrc	Private
0013	1404			LO	DICOCH_-HUCalibrationRescaleSlope	NONE	0	3	DICOCH_-HUCalibrationRescaleSlope	Private
0013	1405			LO	DICOCH_-HUCalibrationRescaleIntercept	NONE	0	3	DICOCH_-HUCalibrationRescaleIntercept	Private
0013	1406			LO	DICOCH_-HUCalibrationRescaleType	NONE	0	3	DICOCH_-HUCalibrationRescaleType	Private
0013	1500			SQ	IIIFInternationalNormLinkSequence	IIIF \ International Norm Link Sequence	0	3	IIIFInternationalNormLinkSequence	Private
0013	1501			UT	IIIFManifestURI	https://song-jung-il.github.io/Public_image/CR_Andong Hahoe Mask.json	0	3	IIIFManifestURI	Private
0013	1502			UT	IIIFImageServiceURI	https://github.com/SONG-JUNG-IL/Public_image/blob/main/CR_Andong Hahoe Mask.jpg	0	3	IIIFImageServiceURI	Private
0013	1503			LO	IIIFComplianceLevel	LEVEL1	0	3	IIIFComplianceLevel	Private
0013	1504			LO	IIIFViewerURImirador	https://projectmirador.org/demo/	0	3	IIIFViewerURImirador	Private
0013	1505			LO	OpenLicenseStatement	PUBLIC	0	3	OpenLicenseStatement	Private
0013	1600			SQ	SecurityAccessSequence	Security \ Access Sequence	0	3	SecurityAccessSequence	Private
0013	1601			LO	AccessLevel	PUBLIC	0	3	AccessLevel	Private
0013	1602			DA	EmbargoEndDate	20250101	0	3	EmbargoEndDate	Private
0013	1603			LO	EncryptionMethod	AES-256-GCM	0	3	EncryptionMethod	Private
0013	1604			LO	HashAlgorithm	SHA-256	0	3	HashAlgorithm	Private
0013	1605			LO	DataChecksum	16 byte MD5	0	3	DataChecksum	Private
0013	1606			LO	LicenseType	NRICH-INT-DATA v1	0	3	LicenseType	Private
0013	1607			LO	AuthorizedUserID	DICOCH_NRICH by SONG JUNG IL	0	3	AuthorizedUserID	Private
0013	1608			UT	AccessAuditTrail	Created:20250101;Accessed:20250101	0	3	AccessAuditTrail	Private
0013	1700			SQ	DICOCH_X-ray CR Sequence	DICOCH_X-ray CR Sequence	0	3	DICOCH_X-ray CR Sequence	Private
0013	1701			LO	BodyPartExamined_	NONE	0	2	Body part examined (CR Series) use PS3.16 Annex L terms (e.g., CHEST, HAND).	Private
0013	1702			LO	KVP	70	0	3	KVP	Private
0013	1703			LO	PlateID	2021_3401_03	0	3	ID/serial number of the sensing plate.	Private
0013	1704			LO	SoftwareVersions	CRxVision\Rhythm Review	0	3	SoftwareVersions	Private
0013	1705			LO	ProtocolName	DICOCH_NRICH by SONG JUNG IL	0	3	ProtocolName	Private
0013	1706			LO	DistanceSource-Detector	1000	0	3	DistanceSource-Detector	Private
0013	1707			LO	DistanceSource-Patient	1000	0	3	DistanceSource-Patient	Private
0013	1708			LO	ExposureTime	30000	0	3	ExposureTime	Private
0013	1709			LO	X-rayTubeCurrent	3	0	3	X-rayTubeCurrent	Private
0013	1710			LO	Exposure	90	0	3	Exposure	Private
0013	1711			LO	FilterType	NONE	0	3	Type of filter inserted into the X-Ray beam.	Private
0013	1712			LO	ImagerPixelSpacing	0.035\0.035	0	3	ImagerPixelSpacing	Private
0013	1713			LO	GeneratorPower	210	0	3	Generator power (kW).	Private
0013	1714			LO	PlateType	IPU	0	3	PlateType	Private
0013	1715			LO	PhosphorType	High resolution (HR): 35 µm	0	3	PhosphorType	Private
0013	1716			LO	AcquisitionDeviceProcessingDescription	CRXvsion	0	3	Device-specific processing description.	Private
0013	1717			LO	AcquisitionDeviceProcessingCode	0	0	3	Device-specific processing code.	Private
0013	1718			LO	CassetteOrientation	PORTRAIT	0	3	LANDSCAPE or PORTRAIT.	Private
0013	1719			LO	CassetteSize	14INX17IN	0	3	e.g., 14INX17IN, 24CMX30CM.	Private
0013	1720			LO	ViewPosition_	NONE	0	2	ViewPosition	Private
0013	1721			LO	Sensitivity	0.100865	0	3	Readout sensitivity (manufacturer-specific).	Private
0013	1800			SQ	DICOCH_X-ray CT Sequence	DICOCH_X-ray CT Sequence	0	3	DICOCH_X-ray CT Sequence	Private
0013	1801			LO	KVP	NONE	0	3	KVP	Private
0013	1802			LO	DistanceSource-Detector	NONE	0	3	DistanceSource-Detector	Private
0013	1803			LO	DistanceSource-Patient	NONE	0	3	DistanceSource-Patient	Private
0013	1804			LO	GantryDetectorTilt	NONE	0	3	GantryDetectorTilt	Private
0013	1805			LO	ExposureTime	NONE	0	3	ExposureTime	Private
0013	1806			LO	X-rayTubeCurrent	NONE	0	3	X-rayTubeCurrent	Private
0013	1807			LO	Exposure	NONE	0	3	Exposure	Private
0013	1808			LO	FocalSpot(s)	NONE	0	3	FocalSpot(s)	Private
0013	1809			LO	FilterMaterial	NONE	0	3	FilterMaterial	Private
0013	1810			LO	TableFeedperRotation	NONE	0	3	TableFeedperRotation	Private
0013	1811			LO	ReconstructionAlgorithm	NONE	0	3	ReconstructionAlgorithm	Private
0013	1900			SQ	DICOCHPrivateTagSequence	DICOCH Private Tag DICOCH = Digital Imaging & Communications for Cultural Heritage	0	3	DICOCHPrivateTagSequence	Private
0013	1901			UT	README_DICOCH_Private_Tags	https://song-jung-il.github.io/Public_image/README_DICOCH_Private_Tags.txt	0	3	README_DICOCH_Private_Tags	Private
0013	1902			UT	DICOCH_private_dict	https://song-jung-il.github.io/Public_image/DICOCH_CR_private_dict.txt	0	3	DICOCH_private_dict	Private
0018	0015			CS	BodyPartExamined	CHEST	0	2	Body Part Examined	Public
0018	0060			DS	KVP	70	0	3	KVP	Public
0018	1004			LO	PlateID	2021_3401_03	0	3	Plate ID	Public
0018	1020			LO	SoftwareVersions	Rhythm Insight RT	0	3	Software Versions	Public
0018	1030			LO	ProtocolName	DICOCH_NRICH by SONG JUNG IL	0	3	Protocol Name	Public
0018	1110			DS	DistanceSource-Detector	1000	0	3	Distance Source to Detector	Public
0018	1111			DS	DistanceSource-Patient	1000	0	3	Distance Source to Patient	Public
0018	1151			IS	X-rayTubeCurrent	3	0	3	X-rayTubeCurrent	Public
0018	1152			IS	Exposure	90	0	3	Exposure	Public
0018	1160			SH	FilterType	NONE	0	3	Type of filter inserted into the X-Ray beam.	Public
0018	1164			DS	ImagerPixelSpacing	0.035\0.035	0	3	ImagerPixelSpacing	Public
0018	1170			IS	GeneratorPower	210	0	3	Generator power (kW).	Public
0018	1260			LO	PlateType	IPU	0	3	PlateType	Public
0018	1261			LO	PhosphorType	High resolution (HR): 35 µm	0	3	PhosphorType	Public
0018	1400			LO	AcquisitionDeviceProcessingDescription	CRXvsion	0	3	Device-specific processing description.	Public
0018	1401			LO	AcquisitionDeviceProcessingCode	0	0	3	Device-specific processing code.	Public
0018	1402			CS	CassetteOrientation	PORTRAIT	0	3	LANDSCAPE or PORTRAIT.	Public
0018	1403			CS	CassetteSize	14INX17IN	0	3	e.g., 14INX17IN, 24CMX30CM.	Public
0018	5101			CS	ViewPosition	PA	0	2	View Position	Public
0018	6000			DS	Sensitivity	0.03	0	3	Readout sensitivity (manufacturer-specific).	Public
0020	000D			UI	StudyInstanceUID	1.2.276.0.7230010.3.1.4.3719806279.3380.1645512104.8639	0	1	Study Instance UID	Public
0020	000E			UI	SeriesInstanceUID	1.2.276.0.7230010.3.1.4.3719806279.3380.1645512104.8640	0	1	Series Instance UID	Public
0020	0010			SH	StudyID	1	0	2	Study ID	Public
0020	0011			IS	SeriesNumber	1	0	2	Series Number	Public
0020	0013			IS	InstanceNumber	2021_3401_03	0	2	Instance Number	Public
0020	0020			CS	PatientOrientation	A\P	0	2C	Patient Orientation	Public
0020	0060			CS	Laterality		0	2C	Laterality	Public
0020	0062			CS	ImageLaterality	L	0	3	Image Laterality	Public
0028	0002			US	SamplesperPixel	1	0	1	Samples per Pixel	Public
0028	0004			CS	PhotometricInterpretation	MONOCHROME2	0	1	Photometric Interpretation	Public
0028	0010			US	Rows	12361	0	1	Rows	Public
0028	0011			US	Columns	10131	0	1	Columns	Public
0028	0100			US	BitsAllocated	16	0	1	Bits Allocated	Public
0028	0101			US	BitsStored	16	0	1	Bits Stored	Public
0028	0102			US	HighBit	15	0	1	High Bit	Public
0028	0103			US	PixelRepresentation	1	0	1	Pixel Representation	Public
0028	1050			DS	WindowCenter	32768	0	3	Window Center	Public
0028	1051			DS	WindowWidth	65535	0	3	Window Width	Public
7FE0	0010			OW	PixelData	<Binary Pixel Data>	0	1	Pixel Data	Public
