# Supplementary material for: A Pipeline Integrating Cultural Heritage X-ray CR/CT Data Using Digital Imaging and Communications in Medicine
Source: Research Square preprint supplement (doi:10.21203/rs.3.rs-8413368/v1), 2026-01-16
Supplement: Supplementary file 1 [file DICOM Validation Report_raw.pdf › CR_Data/Validation Logs_CR_dciodvfy_VENDER_DCM_RAW_Andong Hahoe Mask/output_20250911_DICOM Validation Report_raw_error/DICOM Validation Report_raw.pdf]

# DICOM Validation Report – 2025-09-11 14:47

## File Summary

| File                                 | Errors | Warnings | Private | Total |
|--------------------------------------|--------|----------|---------|-------|
| All files                            | 5      | 10       | 0       | 15    |
| image_current_dcm_하회탈_raw_filter.dcm | 5      | 10       | 0       | 15    |

## Detailed Messages

| File                                 | Severity | Tag       | Message                                                                                                                                                                         |
|--------------------------------------|----------|-----------|---------------------------------------------------------------------------------------------------------------------------------------------------------------------------------|
| image_current_dcm_하회탈_raw_filter.dcm | ERR      |           | Error - Missing attribute Type 2C Conditional Element=<Laterality> Module=<GeneralSeries>                                                                                       |
| image_current_dcm_하회탈_raw_filter.dcm | ERR      |           | Error - Missing attribute Type 1 Required Element=<ConversionType> Module=<SCEquipment>                                                                                         |
| image_current_dcm_하회탈_raw_filter.dcm | ERR      |           | Error - Missing attribute Type 2C Conditional Element=<PatientOrientation> Module=<GeneralImage>                                                                                |
| image_current_dcm_하회탈_raw_filter.dcm | ERR      |           | Error - Attribute present when condition unsatisfied (which may not be present otherwise) Type 1C Conditional Element=<PlanarConfiguration> Module=<ImagePixelDescriptionMacro> |
| image_current_dcm_하회탈_raw_filter.dcm | ERR      |           | Error - Empty attribute (no value) Type 1C Conditional Element=<PixelAspectRatio> Module=<ImagePixelDescriptionMacro>                                                           |
| image_current_dcm_하회탈_raw_filter.dcm | WARN     | 0008,1048 | Warning - Value dubious for this VR - (0x0008,0x1048) PN Physician(s) of Record PN [1] = <UNSPECIFIED> - Retired Person Name form                                               |
| image_current_dcm_하회탈_raw_filter.dcm | WARN     | 0008,1060 | Warning - Value dubious for this VR - (0x0008,0x1060) PN Name of Physician(s) Reading Study PN [1] = <UNSPECIFIED> - Retired Person Name form                                   |
| image_current_dcm_하회탈_raw_filter.dcm | WARN     | 0010,0010 | Warning - Value dubious for this VR - (0x0010,0x0010) PN Patient's Name PN [1] = <20213401> - Retired Person Name form                                                          |

| File                                 | Severity | Tag       | Message                                                                                                               |
|--------------------------------------|----------|-----------|-----------------------------------------------------------------------------------------------------------------------|
| image_current_dcm_하회탈_raw_filter.dcm | WARN     |           | Warning - Unrecognized defined term <SC> for value 1 of attribute <Modality>                                          |
| image_current_dcm_하회탈_raw_filter.dcm | WARN     |           | Warning - Unrecognized defined term <SC> for value 1 of attribute <Modality>                                          |
| image_current_dcm_하회탈_raw_filter.dcm | WARN     | 0008,0061 | Warning - Attribute is not present in standard DICOM IOD - (0x0008,0x0061) CS Modalities in Study                     |
| image_current_dcm_하회탈_raw_filter.dcm | WARN     | 0020,1206 | Warning - Attribute is not present in standard DICOM IOD - (0x0020,0x1206) IS Number of Study Related Series          |
| image_current_dcm_하회탈_raw_filter.dcm | WARN     | 0020,1208 | Warning - Attribute is not present in standard DICOM IOD - (0x0020,0x1208) IS Number of Study Related Instances       |
| image_current_dcm_하회탈_raw_filter.dcm | WARN     | 0028,0008 | Warning - Attribute is not present in standard DICOM IOD - (0x0028,0x0008) IS Number of Frames                        |
| image_current_dcm_하회탈_raw_filter.dcm | WARN     |           | Warning - Dicom dataset contains attributes not present in standard DICOM IOD - this is a Standard Extended SOP Class |

## Full dciodvfy Dumps

▶ image\_current\_dcm\_하회탈\_raw\_filter.dcm

## DICOM Tag Logs (from dataset)

▶ image\_current\_dcm\_하회탈\_raw\_filter.dcm

Raw JSONL: E:\2025 논문\_문화유산 디지털 데이터 개선\논문 1안\_문화유산 비파괴진단 디지털 데이터의 표준화 방안 연구\논문&코드 검증\_20250911\20250909\_CT 규격dcm과 기존 dcm 제작\_태그 샘플 작성\20250905

CR\RAW\_DCM\_CR\output\_20250911\_1447\validation\_20250911\_144749\dciodvfy.jsonl
