# Supplementary material for: A Pipeline Integrating Cultural Heritage X-ray CR/CT Data Using Digital Imaging and Communications in Medicine
Source: Research Square preprint supplement (doi:10.21203/rs.3.rs-8413368/v1), 2026-01-16
Supplement: Supplementary file 2 [file DICOM Validation Report_error.pdf › CT_Data/Validation Logs_CT_dciodvfy_VENDER_DCM_RAW_Andong Hahoe Mask/validation_20250913/DICOM Validation Report_error.pdf]

# DICOM Validation Report – 2025-09-13 19:13

## File Summary

| File                         | Errors | Warnings | Private | Total |
|------------------------------|--------|----------|---------|-------|
| All files                    | 23     | 10       | 0       | 33    |
| DCM_test_CT_각시_slice1177.dcm | 23     | 10       | 0       | 33    |

## Detailed Messages

| File                         | Severity | Tag       | Message                                                                                                                                    |
|------------------------------|----------|-----------|--------------------------------------------------------------------------------------------------------------------------------------------|
| DCM_test_CT_각시_slice1177.dcm | ERR      |           | Error - MediaStorageSOPInstanceUID different from SOPInstanceUID                                                                           |
| DCM_test_CT_각시_slice1177.dcm | ERR      |           | Error - PixelAspectRatio may not be present when it has a ratio of 1:1 - values are 1\1                                                    |
| DCM_test_CT_각시_slice1177.dcm | ERR      | 0018,1150 | Error - Value invalid for this VR - (0x0018,0x1150) IS Exposure Time IS [1] = <0.000000> - Character invalid for this VR = '.' (0x2e)      |
| DCM_test_CT_각시_slice1177.dcm | ERR      | 0018,1151 | Error - Value invalid for this VR - (0x0018,0x1151) IS X-Ray Tube Current IS [1] = <0.000000> - Character invalid for this VR = '.' (0x2e) |
| DCM_test_CT_각시_slice1177.dcm | ERR      | 0018,1152 | Error - Value invalid for this VR - (0x0018,0x1152) IS Exposure IS [1] = <0.000000> - Character invalid for this VR = '.' (0x2e)           |
| DCM_test_CT_각시_slice1177.dcm | ERR      |           | Error - Dicom dataset contains invalid data values for Value Representations                                                               |
| DCM_test_CT_각시_slice1177.dcm | ERR      |           | Error - Missing attribute Type 2 Required Element= <PatientID> Module= <Patient>                                                           |
| DCM_test_CT_각시_slice1177.dcm | ERR      |           | Error - Missing attribute Type 2 Required Element= <PatientBirthDate> Module= <Patient>                                                    |
| DCM_test_CT_각시_slice1177.dcm | ERR      |           | Error - Missing attribute Type 2 Required Element= <PatientSex> Module= <Patient>                                                          |
| DCM_test_CT_각시_slice1177.dcm | ERR      |           | Error - Missing attribute Type 2 Required Element= <ReferringPhysicianName> Module= <GeneralStudy>                                         |
| DCM_test_CT_각시_slice1177.dcm | ERR      |           | Error - Missing attribute Type 2 Required Element= <StudyID> Module= <GeneralStudy>                                                        |
| DCM_test_CT_각시_slice1177.dcm | ERR      |           | Error - Missing attribute Type 2 Required Element= <AccessionNumber> Module= <GeneralStudy>                                                |
| DCM_test_CT_각시_slice1177.dcm | ERR      |           | Error - Missing attribute Type 2 Required Element= <SeriesNumber> Module= <GeneralSeries>                                                  |

| File                         | Severity | Tag       | Message                                                                                                                  |
|------------------------------|----------|-----------|--------------------------------------------------------------------------------------------------------------------------|
| DCM_test_CT_각시_slice1177.dcm | ERR      |           | Error - Missing attribute Type 2C Conditional Element= <Laterality> Module= <GeneralSeries>                              |
| DCM_test_CT_각시_slice1177.dcm | ERR      |           | Error - Missing attribute Type 2C Conditional Element= <PatientPosition> Module= <GeneralSeries>                         |
| DCM_test_CT_각시_slice1177.dcm | ERR      |           | Error - Missing attribute Type 1 Required Element= <FrameOfReferenceUID> Module= <FrameOfReference>                      |
| DCM_test_CT_각시_slice1177.dcm | ERR      |           | Error - Missing attribute Type 2 Required Element= <PositionReferenceIndicator> Module= <FrameOfReference>               |
| DCM_test_CT_각시_slice1177.dcm | ERR      |           | Error - Shall not be present when PixelSpacing is present - attribute <PixelAspectRatio>                                 |
| DCM_test_CT_각시_slice1177.dcm | ERR      |           | Error - Missing attribute Type 1 Required Element= <ImageType> Module= <CTImage>                                         |
| DCM_test_CT_각시_slice1177.dcm | ERR      |           | Error - A value is required for value 3 in CT Images - attribute <ImageType>                                             |
| DCM_test_CT_각시_slice1177.dcm | ERR      |           | Error - Missing attribute Type 1 Required Element= <RescaleIntercept> Module= <CTImage>                                  |
| DCM_test_CT_각시_slice1177.dcm | ERR      |           | Error - Missing attribute Type 1 Required Element= <RescaleSlope> Module= <CTImage>                                      |
| DCM_test_CT_각시_slice1177.dcm | ERR      |           | Error - Missing attribute Type 2 Required Element= <AcquisitionNumber> Module= <CTImage>                                 |
| DCM_test_CT_각시_slice1177.dcm | WARN     |           | Warning - Missing attribute or value that would be needed to build DICOMDIR - Patient ID                                 |
| DCM_test_CT_각시_slice1177.dcm | WARN     |           | Warning - Missing attribute or value that would be needed to build DICOMDIR - Study ID                                   |
| DCM_test_CT_각시_slice1177.dcm | WARN     |           | Warning - Missing attribute or value that would be needed to build DICOMDIR - Series Number                              |
| DCM_test_CT_각시_slice1177.dcm | WARN     | 0010,0010 | Warning - Value dubious for this VR - (0x0010,0x0010) PN Patient's Name PN [1] = <SfxImage2D> - Retired Person Name form |
| DCM_test_CT_각시_slice1177.dcm | WARN     |           | Warning - Value is zero for value 1 of attribute <KVP>                                                                   |
| DCM_test_CT_각시_slice1177.dcm | WARN     |           | Warning - Value is zero for value 1 of attribute <Distance Source to Detector>                                           |
| DCM_test_CT_각시_slice1177.dcm | WARN     |           | Warning - Value is zero for value 1 of attribute <Distance Source to Patient>                                            |
| DCM_test_CT_각시_slice1177.dcm | WARN     |           | Warning - Value is zero for value 1 of attribute <Exposure Time>                                                         |

| File                         | Severity | Tag | Message                                                               |
|------------------------------|----------|-----|-----------------------------------------------------------------------|
| DCM_test_CT_각시_slice1177.dcm | WARN     |     | Warning - Value is zero for value 1 of attribute <X-Ray Tube Current> |
| DCM_test_CT_각시_slice1177.dcm | WARN     |     | Warning - Value is zero for value 1 of attribute <Exposure>           |

## Full dciodvfy Dumps

▶ DCM\_test\_CT\_각시\_slice1177.dcm

## DICOM Tag Logs (from dataset)

▶ DCM\_test\_CT\_각시\_slice1177.dcm

Raw JSONL: C:\Users\USER\Downloads\20250912\_CT 규격dcm과 기존 dcm 제작\_태그 샘플 작성  
\output\_20250913\_1913\validation\_20250913\_191355\dciodvfy.jsonl
