# Supplementary material for: A Pipeline Integrating Cultural Heritage X-ray CR/CT Data Using Digital Imaging and Communications in Medicine
Source: Research Square preprint supplement (doi:10.21203/rs.3.rs-8413368/v1), 2026-01-16
Supplement: Supplementary file 5 [file perf_metrics_20250911.xlsx]

## Sheet: Sheet1
file	errors	warnings	private	total
image_current_dcm_하회탈_raw_filter.dcm	5	10	0	15
