# Supplementary material for: A Pipeline Integrating Cultural Heritage X-ray CR/CT Data Using Digital Imaging and Communications in Medicine
Source: Research Square preprint supplement (doi:10.21203/rs.3.rs-8413368/v1), 2026-01-16
Supplement: Supplementary file 9 [file tags_20250911.xlsx]

## Sheet: Sheet1
file	tag	vr	keyword	value
image_current_dcm_하회탈_raw_filter.dcm	(0008,0005)	CS	SpecificCharacterSet	ISO_IR 192
image_current_dcm_하회탈_raw_filter.dcm	(0008,0008)	CS	ImageType	['DERIVED', 'SECONDARY', 'SINGLE PLANE']
image_current_dcm_하회탈_raw_filter.dcm	(0008,0016)	UI	SOPClassUID	1.2.840.10008.5.1.4.1.1.7
image_current_dcm_하회탈_raw_filter.dcm	(0008,0018)	UI	SOPInstanceUID	1.2.528.1.1001.100.4.11681.8413.66325071390980.20250825013503590
image_current_dcm_하회탈_raw_filter.dcm	(0008,0020)	DA	StudyDate	20250825
image_current_dcm_하회탈_raw_filter.dcm	(0008,0021)	DA	SeriesDate	20250825
image_current_dcm_하회탈_raw_filter.dcm	(0008,0030)	TM	StudyTime	103503
image_current_dcm_하회탈_raw_filter.dcm	(0008,0031)	TM	SeriesTime	103503
image_current_dcm_하회탈_raw_filter.dcm	(0008,0050)	SH	AccessionNumber	UNSPECIFIED
image_current_dcm_하회탈_raw_filter.dcm	(0008,0060)	CS	Modality	SC
image_current_dcm_하회탈_raw_filter.dcm	(0008,0061)	CS	ModalitiesInStudy	CR
image_current_dcm_하회탈_raw_filter.dcm	(0008,0070)	LO	Manufacturer	GE Inspection Technologies
image_current_dcm_하회탈_raw_filter.dcm	(0008,0090)	PN	ReferringPhysicianName
image_current_dcm_하회탈_raw_filter.dcm	(0008,1010)	SH	StationName	CZC75173PY
image_current_dcm_하회탈_raw_filter.dcm	(0008,1030)	LO	StudyDescription	20213401-3
image_current_dcm_하회탈_raw_filter.dcm	(0008,103E)	LO	SeriesDescription	Secondary Capture
image_current_dcm_하회탈_raw_filter.dcm	(0008,1048)	PN	PhysiciansOfRecord	UNSPECIFIED
image_current_dcm_하회탈_raw_filter.dcm	(0008,1060)	PN	NameOfPhysiciansReadingStudy	UNSPECIFIED
image_current_dcm_하회탈_raw_filter.dcm	(0008,1090)	LO	ManufacturerModelName	Rhythm Review
image_current_dcm_하회탈_raw_filter.dcm	(0008,2111)	ST	DerivationDescription	Image Export
image_current_dcm_하회탈_raw_filter.dcm	(0008,2112)	SQ	SourceImageSequence	[(0008,1150) Referenced SOP Class UID UI: Computed Radiography Image Storage (0008,1155) Referenced SOP Instance UID UI: 1.1.20210824.105814949]
image_current_dcm_하회탈_raw_filter.dcm	(0008,1150)	UI	ReferencedSOPClassUID	1.2.840.10008.5.1.4.1.1.1
image_current_dcm_하회탈_raw_filter.dcm	(0008,1155)	UI	ReferencedSOPInstanceUID	1.1.20210824.105814949
image_current_dcm_하회탈_raw_filter.dcm	(0010,0010)	PN	PatientName	20213401
image_current_dcm_하회탈_raw_filter.dcm	(0010,0020)	LO	PatientID	2021-08-20
image_current_dcm_하회탈_raw_filter.dcm	(0010,0030)	DA	PatientBirthDate	20210824
image_current_dcm_하회탈_raw_filter.dcm	(0010,0040)	CS	PatientSex	O
image_current_dcm_하회탈_raw_filter.dcm	(0018,1000)	LO	DeviceSerialNumber	66325071390980
image_current_dcm_하회탈_raw_filter.dcm	(0018,1020)	LO	SoftwareVersions	8.0
image_current_dcm_하회탈_raw_filter.dcm	(0020,000D)	UI	StudyInstanceUID	1.2.528.1.1001.100.2.11681.8413.66325071390980.20250825013503641
image_current_dcm_하회탈_raw_filter.dcm	(0020,000E)	UI	SeriesInstanceUID	1.2.528.1.1001.100.3.11681.8413.66325071390980.20250825013503588
image_current_dcm_하회탈_raw_filter.dcm	(0020,0010)	SH	StudyID	20213401-3
image_current_dcm_하회탈_raw_filter.dcm	(0020,0011)	IS	SeriesNumber	1
image_current_dcm_하회탈_raw_filter.dcm	(0020,0013)	IS	InstanceNumber	1
image_current_dcm_하회탈_raw_filter.dcm	(0020,1206)	IS	NumberOfStudyRelatedSeries	1
image_current_dcm_하회탈_raw_filter.dcm	(0020,1208)	IS	NumberOfStudyRelatedInstances	1
image_current_dcm_하회탈_raw_filter.dcm	(0028,0002)	US	SamplesPerPixel	1
image_current_dcm_하회탈_raw_filter.dcm	(0028,0004)	CS	PhotometricInterpretation	MONOCHROME2
image_current_dcm_하회탈_raw_filter.dcm	(0028,0006)	US	PlanarConfiguration	0
image_current_dcm_하회탈_raw_filter.dcm	(0028,0008)	IS	NumberOfFrames	1
image_current_dcm_하회탈_raw_filter.dcm	(0028,0010)	US	Rows	12361
image_current_dcm_하회탈_raw_filter.dcm	(0028,0011)	US	Columns	10131
image_current_dcm_하회탈_raw_filter.dcm	(0028,0034)	IS	PixelAspectRatio	None
image_current_dcm_하회탈_raw_filter.dcm	(0028,0100)	US	BitsAllocated	16
image_current_dcm_하회탈_raw_filter.dcm	(0028,0101)	US	BitsStored	16
image_current_dcm_하회탈_raw_filter.dcm	(0028,0102)	US	HighBit	15
image_current_dcm_하회탈_raw_filter.dcm	(0028,0103)	US	PixelRepresentation	0
image_current_dcm_하회탈_raw_filter.dcm	(0028,1050)	DS	WindowCenter	32768
image_current_dcm_하회탈_raw_filter.dcm	(0028,1051)	DS	WindowWidth	65536
image_current_dcm_하회탈_raw_filter.dcm	(0028,1055)	LO	WindowCenterWidthExplanation	32768/65536
image_current_dcm_하회탈_raw_filter.dcm	(3109,0010)	LO		Applicare/RadWorks/Version 5.0
image_current_dcm_하회탈_raw_filter.dcm	(3109,0011)	LO		Applicare/RadWorks/Version 6.0/Summary
image_current_dcm_하회탈_raw_filter.dcm	(3109,1001)	ST
image_current_dcm_하회탈_raw_filter.dcm	(3109,1002)	SH		SEEN
image_current_dcm_하회탈_raw_filter.dcm	(3109,1008)	LO		CZC75173PY
image_current_dcm_하회탈_raw_filter.dcm	(3109,100A)	DA		20210824
image_current_dcm_하회탈_raw_filter.dcm	(3109,100B)	TM		105816
image_current_dcm_하회탈_raw_filter.dcm	(3109,1112)	ST		AE_Changename
