# Supplementary material for: A Pipeline Integrating Cultural Heritage X-ray CR/CT Data Using Digital Imaging and Communications in Medicine
Source: Research Square preprint supplement (doi:10.21203/rs.3.rs-8413368/v1), 2026-01-16
Supplement: Supplementary file 13 [file perf_metrics_20250912.xlsx]

## Sheet: Sheet1
file	errors	warnings	private	total
CR_Andong Hahoe Mask.dcm	0	0	146	146
