# Supplementary material for: A Pipeline Integrating Cultural Heritage X-ray CR/CT Data Using Digital Imaging and Communications in Medicine
Source: Research Square preprint supplement (doi:10.21203/rs.3.rs-8413368/v1), 2026-01-16
Supplement: Supplementary file 17 [file tags_20250912.xlsx]

## Sheet: Sheet1
file	tag	vr	keyword	value
CR_Andong Hahoe Mask.dcm	(0008,0005)	CS	SpecificCharacterSet	ISO_IR 192
CR_Andong Hahoe Mask.dcm	(0008,0008)	CS	Image Type	['ORIGINAL', 'PRIMARY']
CR_Andong Hahoe Mask.dcm	(0008,0016)	UI	SOPClassUID	1.2.840.10008.5.1.4.1.1.1
CR_Andong Hahoe Mask.dcm	(0008,0018)	UI	SOPInstanceUID	1.2.528.1.1001.100.4.11681.8413.66325071390980.20250825013503590
CR_Andong Hahoe Mask.dcm	(0008,0020)	DA	StudyDate	20210824
CR_Andong Hahoe Mask.dcm	(0008,0021)	DA	SeriesDate	20210824
CR_Andong Hahoe Mask.dcm	(0008,0023)	DA	ContentDate	20210824
CR_Andong Hahoe Mask.dcm	(0008,0030)	TM	StudyTime	131010
CR_Andong Hahoe Mask.dcm	(0008,0031)	TM	SeriesTime	131010
CR_Andong Hahoe Mask.dcm	(0008,0033)	TM	ContentTime	131010
CR_Andong Hahoe Mask.dcm	(0008,0050)	SH	AccessionNumber	2021340103
CR_Andong Hahoe Mask.dcm	(0008,0060)	CS	Modality	CR
CR_Andong Hahoe Mask.dcm	(0008,0070)	LO	Manufacturer	GE Inspection Technologies
CR_Andong Hahoe Mask.dcm	(0008,0080)	LO	Institution Name	NRICH
CR_Andong Hahoe Mask.dcm	(0008,0090)	PN	ReferringPhysicianName	KOREA^Object
CR_Andong Hahoe Mask.dcm	(0008,1030)	LO	StudyDescription	X-ray CR scan of Cultural Heritage
CR_Andong Hahoe Mask.dcm	(0008,103E)	LO	SeriesDescription	National Treasure No. 21 Andong Hahoe Mask
CR_Andong Hahoe Mask.dcm	(0008,1090)	LO	Manufacturer’sModelName	CRxVision_Rhythm Review
CR_Andong Hahoe Mask.dcm	(0008,2111)	ST	DerivationDescription	IPU2021340103; 12361*10131; TIFF
CR_Andong Hahoe Mask.dcm	(0010,0010)	PN	PatientName	KOREAObject^HeritageObject
CR_Andong Hahoe Mask.dcm	(0010,0020)	LO	PatientID	OBJ-CR-TEST-HAHOE
CR_Andong Hahoe Mask.dcm	(0010,0030)	DA	PatientBirthDate	20240824
CR_Andong Hahoe Mask.dcm	(0010,0040)	CS	PatientSex	O
CR_Andong Hahoe Mask.dcm	(0013,0010)	LO		DICOCH_NRICH by SONG JUNG IL
CR_Andong Hahoe Mask.dcm	(0013,0011)	LO		HeritageMetadataSequence
CR_Andong Hahoe Mask.dcm	(0013,0012)	LO		GrayValue-HU_PointSequence
CR_Andong Hahoe Mask.dcm	(0013,0013)	LO		DICOCH_GrayValue-HU_ROISequence
CR_Andong Hahoe Mask.dcm	(0013,0014)	LO		HUCalibrationSequence
CR_Andong Hahoe Mask.dcm	(0013,0015)	LO		IIIFInternationalNormLinkSequence
CR_Andong Hahoe Mask.dcm	(0013,0016)	LO		SecurityAccessSequence
CR_Andong Hahoe Mask.dcm	(0013,0017)	LO		DICOCH_X-ray CR Sequence
CR_Andong Hahoe Mask.dcm	(0013,0018)	LO		DICOCH_X-ray CT Sequence
CR_Andong Hahoe Mask.dcm	(0013,0019)	LO		DICOCHPrivateTagSequence
CR_Andong Hahoe Mask.dcm	(0013,1100)	SQ		[]
CR_Andong Hahoe Mask.dcm	(0013,1101)	LO		Andong Hahoe Yangban Mask
CR_Andong Hahoe Mask.dcm	(0013,1102)	LO		KR-AHYM-NT121-YB
CR_Andong Hahoe Mask.dcm	(0013,1103)	LO		Goryeo Dynasty, 12th–13th
CR_Andong Hahoe Mask.dcm	(0013,1104)	UT		Salix spp.
CR_Andong Hahoe Mask.dcm	(0013,1105)	UT		Surface_Crack_3
CR_Andong Hahoe Mask.dcm	(0013,1106)	LO		NationalTreasure NO.121
CR_Andong Hahoe Mask.dcm	(0013,1107)	UT		X-ray NONE-destructive Precision Documentation and Internal Structure Analysis
CR_Andong Hahoe Mask.dcm	(0013,1108)	UT		National Research Institute of Cultural Heritage, NRICH
CR_Andong Hahoe Mask.dcm	(0013,1109)	UT		132 Munji-ro, Yuseong-gu, Daejeon, South Korea
CR_Andong Hahoe Mask.dcm	(0013,1200)	SQ		[]
CR_Andong Hahoe Mask.dcm	(0013,1201)	LO		MASK_1_Point_background
CR_Andong Hahoe Mask.dcm	(0013,1202)	LO		(x=1721, y=2535)
CR_Andong Hahoe Mask.dcm	(0013,1203)	LO		20560
CR_Andong Hahoe Mask.dcm	(0013,1204)	LO		NONE
CR_Andong Hahoe Mask.dcm	(0013,1205)	LO		MASK_2_Point_WoodMask_Brow
CR_Andong Hahoe Mask.dcm	(0013,1206)	LO		(x=6154, y=3018)
CR_Andong Hahoe Mask.dcm	(0013,1207)	LO		37522
CR_Andong Hahoe Mask.dcm	(0013,1208)	LO		NONE
CR_Andong Hahoe Mask.dcm	(0013,1209)	LO		MASK_3_Point_WoodMask_Nose
CR_Andong Hahoe Mask.dcm	(0013,1210)	LO		(x=5066, y=5384)
CR_Andong Hahoe Mask.dcm	(0013,1211)	LO		29298
CR_Andong Hahoe Mask.dcm	(0013,1212)	LO		NONE
CR_Andong Hahoe Mask.dcm	(0013,1213)	LO		MASK_4_Point_WoodMask_Hole around the Jaw
CR_Andong Hahoe Mask.dcm	(0013,1214)	LO		(x=4670, y=8667)
CR_Andong Hahoe Mask.dcm	(0013,1215)	LO		1799
CR_Andong Hahoe Mask.dcm	(0013,1216)	LO		NONE
CR_Andong Hahoe Mask.dcm	(0013,1217)	LO		MASK_5_Point_WoodMask_Jaw
CR_Andong Hahoe Mask.dcm	(0013,1218)	LO		(x=5164, y=9512)
CR_Andong Hahoe Mask.dcm	(0013,1219)	LO		36237
CR_Andong Hahoe Mask.dcm	(0013,1220)	LO		NONE
CR_Andong Hahoe Mask.dcm	(0013,1300)	SQ		[]
CR_Andong Hahoe Mask.dcm	(0013,1301)	LO		MASK_1_ROI_background
CR_Andong Hahoe Mask.dcm	(0013,1302)	LO		Polygon
CR_Andong Hahoe Mask.dcm	(0013,1303)	UT		ROI_point(x=1623, y=2149), ROI_px(W=594, H=797)
CR_Andong Hahoe Mask.dcm	(0013,1304)	LO		20083.85693
CR_Andong Hahoe Mask.dcm	(0013,1305)	LO		5654
CR_Andong Hahoe Mask.dcm	(0013,1306)	LO		41634
CR_Andong Hahoe Mask.dcm	(0013,1307)	LO		3891.908759
CR_Andong Hahoe Mask.dcm	(0013,1308)	LO		NONE
CR_Andong Hahoe Mask.dcm	(0013,1309)	LO		NONE
CR_Andong Hahoe Mask.dcm	(0013,1310)	UT		NONE
CR_Andong Hahoe Mask.dcm	(0013,1311)	LO		NONE
CR_Andong Hahoe Mask.dcm	(0013,1312)	LO		MASK_2_ROI_WoodMask_Brow
CR_Andong Hahoe Mask.dcm	(0013,1313)	LO		Polygon
CR_Andong Hahoe Mask.dcm	(0013,1314)	UT		ROI_point(x=5916, y=2849), ROI_px(W=336, H=459)
CR_Andong Hahoe Mask.dcm	(0013,1315)	LO		33858.625175
CR_Andong Hahoe Mask.dcm	(0013,1316)	LO		13621
CR_Andong Hahoe Mask.dcm	(0013,1317)	LO		64764
CR_Andong Hahoe Mask.dcm	(0013,1318)	LO		7851.816547
CR_Andong Hahoe Mask.dcm	(0013,1319)	LO		NONE
CR_Andong Hahoe Mask.dcm	(0013,1320)	LO		NONE
CR_Andong Hahoe Mask.dcm	(0013,1321)	UT		NONE
CR_Andong Hahoe Mask.dcm	(0013,1322)	LO		NONE
CR_Andong Hahoe Mask.dcm	(0013,1323)	LO		MASK_3_ROI_WoodMask_Nose
CR_Andong Hahoe Mask.dcm	(0013,1324)	LO		Polygon
CR_Andong Hahoe Mask.dcm	(0013,1325)	UT		ROI_point(x=4769, y=5311), ROI_px(W=317, H=386)
CR_Andong Hahoe Mask.dcm	(0013,1326)	LO		37413.650521
CR_Andong Hahoe Mask.dcm	(0013,1327)	LO		19532
CR_Andong Hahoe Mask.dcm	(0013,1328)	LO		65021
CR_Andong Hahoe Mask.dcm	(0013,1329)	LO		8561.402994
CR_Andong Hahoe Mask.dcm	(0013,1330)	LO		NONE
CR_Andong Hahoe Mask.dcm	(0013,1331)	LO		NONE
CR_Andong Hahoe Mask.dcm	(0013,1332)	UT		NONE
CR_Andong Hahoe Mask.dcm	(0013,1333)	LO		NONE
CR_Andong Hahoe Mask.dcm	(0013,1334)	LO		MASK_4_ROI_WoodMask_Hole around the Jaw
CR_Andong Hahoe Mask.dcm	(0013,1335)	LO		Polygon
CR_Andong Hahoe Mask.dcm	(0013,1336)	UT		ROI_point(x=4531, y=8474), ROI_px(W=277, H=362)
CR_Andong Hahoe Mask.dcm	(0013,1337)	LO		32877.97458
CR_Andong Hahoe Mask.dcm	(0013,1338)	LO		257
CR_Andong Hahoe Mask.dcm	(0013,1339)	LO		65021
CR_Andong Hahoe Mask.dcm	(0013,1340)	LO		15821.185707
CR_Andong Hahoe Mask.dcm	(0013,1341)	LO		NONE
CR_Andong Hahoe Mask.dcm	(0013,1342)	LO		NONE
CR_Andong Hahoe Mask.dcm	(0013,1343)	UT		NONE
CR_Andong Hahoe Mask.dcm	(0013,1344)	LO		NONE
CR_Andong Hahoe Mask.dcm	(0013,1345)	LO		MASK_5_ROI_WoodMask_Jaw
CR_Andong Hahoe Mask.dcm	(0013,1346)	LO		Polygon
CR_Andong Hahoe Mask.dcm	(0013,1347)	UT		ROI_point(x=4808, y=9343), ROI_px(W=396, H=628)
CR_Andong Hahoe Mask.dcm	(0013,1348)	LO		37585.010925
CR_Andong Hahoe Mask.dcm	(0013,1349)	LO		10023
CR_Andong Hahoe Mask.dcm	(0013,1350)	LO		63736
CR_Andong Hahoe Mask.dcm	(0013,1351)	LO		9378.909692
CR_Andong Hahoe Mask.dcm	(0013,1352)	LO		NONE
CR_Andong Hahoe Mask.dcm	(0013,1353)	LO		NONE
CR_Andong Hahoe Mask.dcm	(0013,1354)	UT		NONE
CR_Andong Hahoe Mask.dcm	(0013,1355)	LO		NONE
CR_Andong Hahoe Mask.dcm	(0013,1400)	SQ		[]
CR_Andong Hahoe Mask.dcm	(0013,1401)	LO		NONE
CR_Andong Hahoe Mask.dcm	(0013,1402)	LO		NONE
CR_Andong Hahoe Mask.dcm	(0013,1403)	UT		NONE
CR_Andong Hahoe Mask.dcm	(0013,1404)	LO		NONE
CR_Andong Hahoe Mask.dcm	(0013,1405)	LO		NONE
CR_Andong Hahoe Mask.dcm	(0013,1406)	LO		NONE
CR_Andong Hahoe Mask.dcm	(0013,1500)	SQ		[]
CR_Andong Hahoe Mask.dcm	(0013,1501)	UT		https://song-jung-il.github.io/Public_image/CR_Andong Hahoe Mask.json
CR_Andong Hahoe Mask.dcm	(0013,1502)	UT		https://github.com/SONG-JUNG-IL/Public_image/blob/main/CR_Andong Hahoe Mask.jpg
CR_Andong Hahoe Mask.dcm	(0013,1503)	LO		LEVEL1
CR_Andong Hahoe Mask.dcm	(0013,1504)	LO		https://projectmirador.org/demo/
CR_Andong Hahoe Mask.dcm	(0013,1505)	LO		PUBLIC
CR_Andong Hahoe Mask.dcm	(0013,1600)	SQ		[]
CR_Andong Hahoe Mask.dcm	(0013,1601)	LO		PUBLIC
CR_Andong Hahoe Mask.dcm	(0013,1602)	DA		20250101
CR_Andong Hahoe Mask.dcm	(0013,1603)	LO		AES-256-GCM
CR_Andong Hahoe Mask.dcm	(0013,1604)	LO		SHA-256
CR_Andong Hahoe Mask.dcm	(0013,1605)	LO		16 byte MD5
CR_Andong Hahoe Mask.dcm	(0013,1606)	LO		NRICH-INT-DATA v1
CR_Andong Hahoe Mask.dcm	(0013,1607)	LO		DICOCH_NRICH by SONG JUNG IL
CR_Andong Hahoe Mask.dcm	(0013,1608)	UT		Created:20250101;Accessed:20250101
CR_Andong Hahoe Mask.dcm	(0013,1700)	SQ		[]
CR_Andong Hahoe Mask.dcm	(0013,1701)	LO		NONE
CR_Andong Hahoe Mask.dcm	(0013,1702)	LO		70
CR_Andong Hahoe Mask.dcm	(0013,1703)	LO		2021_3401_03
CR_Andong Hahoe Mask.dcm	(0013,1704)	LO		['CRxVision', 'Rhythm Review']
CR_Andong Hahoe Mask.dcm	(0013,1705)	LO		DICOCH_NRICH by SONG JUNG IL
CR_Andong Hahoe Mask.dcm	(0013,1706)	LO		1000
CR_Andong Hahoe Mask.dcm	(0013,1707)	LO		1000
CR_Andong Hahoe Mask.dcm	(0013,1708)	LO		30000
CR_Andong Hahoe Mask.dcm	(0013,1709)	LO		3
CR_Andong Hahoe Mask.dcm	(0013,1710)	LO		90
CR_Andong Hahoe Mask.dcm	(0013,1711)	LO		NONE
CR_Andong Hahoe Mask.dcm	(0013,1712)	LO		['0.035', '0.035']
CR_Andong Hahoe Mask.dcm	(0013,1713)	LO		210
CR_Andong Hahoe Mask.dcm	(0013,1714)	LO		IPU
CR_Andong Hahoe Mask.dcm	(0013,1715)	LO		High resolution (HR): 35 µm
CR_Andong Hahoe Mask.dcm	(0013,1716)	LO		CRXvsion
CR_Andong Hahoe Mask.dcm	(0013,1717)	LO		0
CR_Andong Hahoe Mask.dcm	(0013,1718)	LO		PORTRAIT
CR_Andong Hahoe Mask.dcm	(0013,1719)	LO		14INX17IN
CR_Andong Hahoe Mask.dcm	(0013,1720)	LO		NONE
CR_Andong Hahoe Mask.dcm	(0013,1721)	LO		0.10086478
CR_Andong Hahoe Mask.dcm	(0013,1800)	SQ		[]
CR_Andong Hahoe Mask.dcm	(0013,1801)	LO		NONE
CR_Andong Hahoe Mask.dcm	(0013,1802)	LO		NONE
CR_Andong Hahoe Mask.dcm	(0013,1803)	LO		NONE
CR_Andong Hahoe Mask.dcm	(0013,1804)	LO		NONE
CR_Andong Hahoe Mask.dcm	(0013,1805)	LO		NONE
CR_Andong Hahoe Mask.dcm	(0013,1806)	LO		NONE
CR_Andong Hahoe Mask.dcm	(0013,1807)	LO		NONE
CR_Andong Hahoe Mask.dcm	(0013,1808)	LO		NONE
CR_Andong Hahoe Mask.dcm	(0013,1809)	LO		NONE
CR_Andong Hahoe Mask.dcm	(0013,1810)	LO		NONE
CR_Andong Hahoe Mask.dcm	(0013,1811)	LO		NONE
CR_Andong Hahoe Mask.dcm	(0013,1900)	SQ		[]
CR_Andong Hahoe Mask.dcm	(0013,1901)	UT		https://song-jung-il.github.io/Public_image/README_DICOCH_Private_Tags.txt
CR_Andong Hahoe Mask.dcm	(0013,1902)	UT		https://song-jung-il.github.io/Public_image/DICOCH_CR_private_dict.txt
CR_Andong Hahoe Mask.dcm	(0018,0015)	CS	BodyPartExamined	CHEST
CR_Andong Hahoe Mask.dcm	(0018,0060)	DS	KVP	70
CR_Andong Hahoe Mask.dcm	(0018,1004)	LO	PlateID	2021_3401_03
CR_Andong Hahoe Mask.dcm	(0018,1020)	LO	SoftwareVersions	Rhythm Insight RT
CR_Andong Hahoe Mask.dcm	(0018,1030)	LO	ProtocolName	DICOCH_NRICH by SONG JUNG IL
CR_Andong Hahoe Mask.dcm	(0018,1110)	DS	DistanceSource-Detector	1000
CR_Andong Hahoe Mask.dcm	(0018,1111)	DS	DistanceSource-Patient	1000
CR_Andong Hahoe Mask.dcm	(0018,1151)	IS	X-rayTubeCurrent	3
CR_Andong Hahoe Mask.dcm	(0018,1152)	IS	Exposure	90
CR_Andong Hahoe Mask.dcm	(0018,1160)	SH	FilterType	NONE
CR_Andong Hahoe Mask.dcm	(0018,1164)	DS	ImagerPixelSpacing	[0.035, 0.035]
CR_Andong Hahoe Mask.dcm	(0018,1170)	IS	GeneratorPower	210
CR_Andong Hahoe Mask.dcm	(0018,1260)	LO	PlateType	IPU
CR_Andong Hahoe Mask.dcm	(0018,1261)	LO	PhosphorType	High resolution (HR): 35 µm
CR_Andong Hahoe Mask.dcm	(0018,1400)	LO	AcquisitionDeviceProcessingDescription	CRXvsion
CR_Andong Hahoe Mask.dcm	(0018,1401)	LO	AcquisitionDeviceProcessingCode	0
CR_Andong Hahoe Mask.dcm	(0018,1402)	CS	CassetteOrientation	PORTRAIT
CR_Andong Hahoe Mask.dcm	(0018,1403)	CS	CassetteSize	14INX17IN
CR_Andong Hahoe Mask.dcm	(0018,5101)	CS	ViewPosition	PA
CR_Andong Hahoe Mask.dcm	(0018,6000)	DS	Sensitivity	0.03
CR_Andong Hahoe Mask.dcm	(0020,000D)	UI	StudyInstanceUID	1.2.276.0.7230010.3.1.4.3719806279.3380.1645512104.8639
CR_Andong Hahoe Mask.dcm	(0020,000E)	UI	SeriesInstanceUID	1.2.276.0.7230010.3.1.4.3719806279.3380.1645512104.8640
CR_Andong Hahoe Mask.dcm	(0020,0010)	SH	StudyID	1
CR_Andong Hahoe Mask.dcm	(0020,0011)	IS	SeriesNumber	1
CR_Andong Hahoe Mask.dcm	(0020,0013)	IS	InstanceNumber	2021
CR_Andong Hahoe Mask.dcm	(0020,0020)	CS	PatientOrientation	['A', 'P']
CR_Andong Hahoe Mask.dcm	(0020,0062)	CS	ImageLaterality	L
CR_Andong Hahoe Mask.dcm	(0028,0002)	US	SamplesperPixel	1
CR_Andong Hahoe Mask.dcm	(0028,0004)	CS	PhotometricInterpretation	MONOCHROME2
CR_Andong Hahoe Mask.dcm	(0028,0010)	US	Rows	12361
CR_Andong Hahoe Mask.dcm	(0028,0011)	US	Columns	10131
CR_Andong Hahoe Mask.dcm	(0028,0100)	US	BitsAllocated	16
CR_Andong Hahoe Mask.dcm	(0028,0101)	US	BitsStored	16
CR_Andong Hahoe Mask.dcm	(0028,0102)	US	HighBit	15
CR_Andong Hahoe Mask.dcm	(0028,0103)	US	PixelRepresentation	0
CR_Andong Hahoe Mask.dcm	(0028,1050)	DS	WindowCenter	32768
CR_Andong Hahoe Mask.dcm	(0028,1051)	DS	WindowWidth	65535
