# Supplementary material for: A Pipeline Integrating Cultural Heritage X-ray CR/CT Data Using Digital Imaging and Communications in Medicine
Source: Research Square preprint supplement (doi:10.21203/rs.3.rs-8413368/v1), 2026-01-16
Supplement: Supplementary file 41 [file 2.tag_template_filled_20250908_각시_CT_minset_2.xlsx]

## Sheet: Sheet1
group	element	parenttag	filepath	vr	keyword	value	itemindex	level	type	description	publicflag	rescaleslope	rescaleintercept	rescaletype	calphantomid
0002	0000			UL	FileMetaInformationGroupLength		1	FileMeta	1	FileMetaInformationGroupLength	Public
0002	0001			OB	File Meta Information Version	00\01	1	FileMeta	1	File Meta Information Version	Public
0002	0002			UI	MediaStorageSOPClassUID	1.2.840.10008.5.1.4.1.1.2	1	FileMeta	1	MediaStorageSOPClassUID	Public
0002	0003			UI	MediaStorageSOPInstanceUID	1.2.276.0.7230010.3.1.4.3719806279.3380.1645489980.437	1	FileMeta	1	MediaStorageSOPInstanceUID	Public
0002	0010			UI	TransferSyntaxUID	1.2.840.10008.1.2	1	FileMeta	1	TransferSyntaxUID	Public
0002	0012			UI	ImplementationClassUID	1.2.276.0.7230010.3.0.3.6.0	1	FileMeta	1	ImplementationClassUID	Public
0002	0013			SH	ImplementationVersionName	OFFIS_DCMTK_360	1	FileMeta	1	ImplementationVersionName	Public
0002	0016			AE	Source Application Entity Title	NRICH_AE	1	FileMeta	1	Source Application Entity Title	Public
0002	0017			AE	Sending Application Entity Title	NRICH_AE	1	FileMeta	2	Sending Application Entity Title	Public
0002	0018			AE	Receiving Application Entity Title	NRICH_AE	1	FileMeta	1	Receiving Application Entity Title	Public
0008	0005			CS	SpecificCharacterSet	ISO_IR 192	1	Main/Dataset	1	SpecificCharacterSet	Public
0008	0008			CS	Image Type	DERIVED\PRIMARY\AXIAL	1	Image	3	Image Type	Public
0008	0016			UI	SOPClassUID	1.2.840.10008.5.1.4.1.1.2	1	Image	3	SOPClassUID	Public
0008	0018			UI	SOPInstanceUID	1.2.276.0.7230010.3.1.4.3719806279.3380.1645512530.9818	1	Image	3	SOPInstanceUID	Public
0008	0020			DA	StudyDate	20250723	1	FileMeta	1	StudyDate	Public
0008	0021			DA	SeriesDate	20250723	1	FileMeta	1	SeriesDate	Public
0008	0023			DA	ContentDate	20250723	1	FileMeta	1	ContentDate	Public
0008	0030			TM	StudyTime	140925	1	FileMeta	1	StudyTime	Public
0008	0031			TM	SeriesTime	140925	1	FileMeta	1	SeriesTime	Public
0008	0033			TM	ContentTime	140925	1	FileMeta	1	ContentTime	Public
0008	0050			SH	AccessionNumber	1177	1	FileMeta	2	AccessionNumber	Public
0008	0060			CS	Modality	CT	1	Series	1	Modality	Public
0008	0070			LO	Manufacturer	NRICH by SONG JUNG IL	1	Study	3	Manufacturer	Public
0008	0080			LO	Institution Name	NRICH	1	Study	3	Institution Name	Public
0008	0090			PN	ReferringPhysicianName	KOREA^Object	1	FileMeta	2	ReferringPhysicianName	Public
0008	1030			LO	StudyDescription	X-ray CT scan of cultural heritage	1	Study	3	StudyDescription	Public
0008	103E			LO	SeriesDescription	National Treasure No. 21 Andong Hahoe Mask	1	FileMeta	3	SeriesDescription	Public
0008	1090			LO	Manufacturer’sModelName	DICOCH Converter v3.3	1	Study	3	Manufacturer’sModelName	Public
0008	2111			ST	DerivationDescription	slice1177; 2048*2048; dcm to PNG	1	Image	3	DerivationDescription	Public
0010	0010			PN	PatientName	KOREAObject^HeritageObject	1	Image	3	PatientName	Public
0010	0020			LO	PatientID	OBJ-CT-TEST-HAHOE	1	Image	3	PatientID	Public
0010	0030			DA	PatientBirthDate	20250723	1	Image	3	PatientBirthDate	Public
0010	0040			CS	PatientSex	O	1	Image	3	PatientSex	Public
0013	0010			LO	_PrivateCreator	DICOCH_NRICH by SONG JUNG IL	1	Private	3	_PrivateCreator	Private
0013	0011			LO	PrivateCreator20	HeritageMetadataSequence	1	Private	3	PrivateCreator20	Private
0013	0012			LO	PrivateCreator30	GrayValue-HU_PointSequence	1	Private	3	PrivateCreator30	Private
0013	0013			LO	PrivateCreator40	DICOCH_GrayValue-HU_ROISequence	1	Private	3	PrivateCreator40	Private
0013	0014			LO	PrivateCreator50	HUCalibrationSequence	1	Private	3	PrivateCreator50	Private
0013	0015			LO	PrivateCreator60	IIIFInternationalNormLinkSequence	1	Private	3	PrivateCreator60	Private
0013	0016			LO	PrivateCreator70	SecurityAccessSequence	1	Private	3	PrivateCreator70	Private
0013	0017			LO	PrivateCreator80	DICOCH_X-ray CR Sequence	1	Private	3	PrivateCreator80	Private
0013	0018			LO	PrivateCreator90	DICOCH_X-ray CT Sequence	1	Private	3	PrivateCreator90	Private
0013	0019			LO	PrivateCreator100	DICOCHPrivateTagSequence	1	Private	3	PrivateCreator100	Private
0013	1100			SQ	HeritageMetadataSequence	Heritage Metadata Sequence	1	Private	3	HeritageMetadataSequence	Private
0013	1101			LO	HeritageName	Andong Hahoe Yangban Mask	1	Private	3	HeritageName	Private
0013	1102			LO	HeritageID	KR-AHYM-NT121-YB	1	Private	3	HeritageID	Private
0013	1103			LO	HistoricPeriod	Goryeo Dynasty, 12th–13th	1	Private	3	HistoricPeriod	Private
0013	1104			UT	MaterialComposition	Salix spp.	1	Private	3	MaterialComposition	Private
0013	1105			UT	ConditionStatus	Surface_Crack_3	1	Private	3	ConditionStatus	Private
0013	1106			LO	CulturalSignificance	NationalTreasure NO.121	1	Private	3	CulturalSignificance	Private
0013	1107			UT	InvestigationPurpose	X-ray Non-destructive Precision Documentation and Internal Structure Analysis	1	Private	3	InvestigationPurpose	Private
0013	1108			UT	Investigator	National Research Institute of Cultural Heritage, NRICH	1	Private	3	Investigator	Private
0013	1109			UT	SiteLocation	132 Munji-ro, Yuseong-gu, Daejeon, South Korea	1	Private	3	SiteLocation	Private
0013	1200			SQ	GrayValue-HU_PointSequence	GrayValue-HU_PointSequence	1	Private	3	GrayValue-HU_PointSequence	Private
0013	1201			LO	GrayValue-HU_1_Label	MASK_1_air	1	Private	3	GrayValue-HU_1_Label	Private
0013	1202			LO	GrayValue-HU_1_Position(x,y)	(128,140)	1	Private	3	GrayValue-HU_1_Position(x,y)	Private
0013	1203			LO	GrayValue_1	0	1	Private	3	GrayValue_1	Private
0013	1204			LO	HU_1	-1024	1	Private	3	HU_1	Private
0013	1205			LO	GrayValue-HU_2_Label	MASK_2_background	1	Private	3	GrayValue-HU_2_Label	Private
0013	1206			LO	GrayValue-HU_2_Position(x,y)	(540,448)	1	Private	3	GrayValue-HU_2_Position(x,y)	Private
0013	1207			LO	GrayValue_2	2000	1	Private	3	GrayValue_2	Private
0013	1208			LO	HU_2	976	1	Private	3	HU_2	Private
0013	1209			LO	GrayValue-HU_3_Label	MASK_3_wood	1	Private	3	GrayValue-HU_3_Label	Private
0013	1210			LO	GrayValue-HU_3_Position(x,y)	(608,784)	1	Private	3	GrayValue-HU_3_Position(x,y)	Private
0013	1211			LO	GrayValue_3	2008	1	Private	3	GrayValue_3	Private
0013	1212			LO	HU_3	984	1	Private	3	HU_3	Private
0013	1213			LO	GrayValue-HU_4_Label	MASK_4_pgment	1	Private	3	GrayValue-HU_4_Label	Private
0013	1214			LO	GrayValue-HU_4_Position(x,y)	(684,676)	1	Private	3	GrayValue-HU_4_Position(x,y)	Private
0013	1215			LO	GrayValue_4	2009	1	Private	3	GrayValue_4	Private
0013	1216			LO	HU_4	985	1	Private	3	HU_4	Private
0013	1217			LO	GrayValue-HU_5_Label	MASK_5_iron nail	1	Private	3	GrayValue-HU_5_Label	Private
0013	1218			LO	GrayValue-HU_5_Position(x,y)	(1324,944)	1	Private	3	GrayValue-HU_5_Position(x,y)	Private
0013	1219			LO	GrayValue_5	2105	1	Private	3	GrayValue_5	Private
0013	1220			LO	HU_5	1081	1	Private	3	HU_5	Private
0013	1300			SQ	DICOCH_GrayValue-HU_ROISequence	ROI Gray Value Sequence	1	Private	3	DICOCH_GrayValue-HU_ROISequence	Private
0013	1301			LO	GrayValue-HU_1_ROILabel	MASK_1_air	1	Private	3	GrayValue-HU_1_ROILabel	Private
0013	1302			LO	GrayValue-HU_1_ROIType	Polygon	1	Private	3	GrayValue-HU_1_ROIType	Private
0013	1303			UT	GrayValue-HU_1_ROICoordinates	(108, 84), (108, 184), (208, 84), (208, 184)	1	Private	3	GrayValue-HU_1_ROICoordinates	Private
0013	1304			LO	GrayValueROIMean_1	0	1	Private	3	GrayValueROIMean_1	Private
0013	1305			LO	GrayValueROIMin_1	0	1	Private	3	GrayValueROIMin_1	Private
0013	1306			LO	GrayValueROIMax_1	0	1	Private	3	GrayValueROIMax_1	Private
0013	1307			LO	GrayValueROIStdDev_1	0	1	Private	3	GrayValueROIStdDev_1	Private
0013	1308			LO	HUROIMean_1	-1024	1	Private	3	GrayValueHUMean_1	Private
0013	1309			LO	HUROIMin_1	-1024	1	Private	3	GrayValueHUMin_1	Private
0013	1310			UT	HUROIMax_1	-1024	1	Private	3	GrayValueHUMax_1	Private
0013	1311			LO	HUROIStdDev_1	0	1	Private	3	GrayValueHUStdDev_1	Private
0013	1312			LO	GrayValue-HU_2_ROILabel	MASK_2_background	1	Private	3	GrayValue-HU_2_ROILabel	Private
0013	1313			LO	GrayValue-HU_2_ROIType	Polygon	1	Private	3	GrayValue-HU_2_ROIType	Private
0013	1314			UT	GrayValue-HU_2_ROICoordinates	(496, 412), (496, 512), (596, 412), (596, 512)	1	Private	3	GrayValue-HU_2_ROICoordinates	Private
0013	1315			LO	GrayValueROIMean_2	1999.9	1	Private	3	GrayValueROIMean_2	Private
0013	1316			LO	GrayValueROIMin_2	1999	1	Private	3	GrayValueROIMin_2	Private
0013	1317			LO	GrayValueROIMax_2	2000	1	Private	3	GrayValueROIMax_2	Private
0013	1318			LO	GrayValueROIStdDev_2	0.551778	1	Private	3	GrayValueROIStdDev_2	Private
0013	1319			LO	HUROIMean_2	975.904	1	Private	3	GrayValueHUMean_2	Private
0013	1320			LO	HUROIMin_2	975	1	Private	3	GrayValueHUMin_2	Private
0013	1321			UT	HUROIMax_2	976	1	Private	3	GrayValueHUMax_2	Private
0013	1322			LO	HUROIStdDev_2	0.551772	1	Private	3	GrayValueHUStdDev_2	Private
0013	1323			LO	GrayValue-HU_3_ROILabel	MASK_3_wood	1	Private	3	GrayValue-HU_3_ROILabel	Private
0013	1324			LO	GrayValue-HU_3_ROIType	Polygon	1	Private	3	GrayValue-HU_3_ROIType	Private
0013	1325			UT	GrayValue-HU_3_ROICoordinates	(556, 768), (556, 868), (656, 768), (656, 868)	1	Private	3	GrayValue-HU_3_ROICoordinates	Private
0013	1326			LO	GrayValueROIMean_3	2007.92	1	Private	3	GrayValueROIMean_3	Private
0013	1327			LO	GrayValueROIMin_3	2007	1	Private	3	GrayValueROIMin_3	Private
0013	1328			LO	GrayValueROIMax_3	2009	1	Private	3	GrayValueROIMax_3	Private
0013	1329			LO	GrayValueROIStdDev_3	1.00117	1	Private	3	GrayValueROIStdDev_3	Private
0013	1330			LO	HUROIMean_3	983.916	1	Private	3	GrayValueHUMean_3	Private
0013	1331			LO	HUROIMin_3	983	1	Private	3	GrayValueHUMin_3	Private
0013	1332			UT	HUROIMax_3	985	1	Private	3	GrayValueHUMax_3	Private
0013	1333			LO	HUROIStdDev_3	1.00117	1	Private	3	GrayValueHUStdDev_3	Private
0013	1334			LO	GrayValue-HU_4_ROILabel	MASK_4_pgment	1	Private	3	GrayValue-HU_4_ROILabel	Private
0013	1335			LO	GrayValue-HU_4_ROIType	Polygon	1	Private	3	GrayValue-HU_4_ROIType	Private
0013	1336			UT	GrayValue-HU_4_ROICoordinates	(664, 648), (664, 748), (764, 648), (764, 748)	1	Private	3	GrayValue-HU_4_ROICoordinates	Private
0013	1337			LO	GrayValueROIMean_4	2009.54	1	Private	3	GrayValueROIMean_4	Private
0013	1338			LO	GrayValueROIMin_4	1991	1	Private	3	GrayValueROIMin_4	Private
0013	1339			LO	GrayValueROIMax_4	2161	1	Private	3	GrayValueROIMax_4	Private
0013	1340			LO	GrayValueROIStdDev_4	93.2606	1	Private	3	GrayValueROIStdDev_4	Private
0013	1341			LO	HUROIMean_4	985.535	1	Private	3	GrayValueHUMean_4	Private
0013	1342			LO	HUROIMin_4	967	1	Private	3	GrayValueHUMin_4	Private
0013	1343			UT	HUROIMax_4	1137	1	Private	3	GrayValueHUMax_4	Private
0013	1344			LO	HUROIStdDev_4	93.2606	1	Private	3	GrayValueHUStdDev_4	Private
0013	1345			LO	GrayValue-HU_5_ROILabel	MASK_5_iron nail	1	Private	3	GrayValue-HU_5_ROILabel	Private
0013	1346			LO	GrayValue-HU_5_ROIType	Polygon	1	Private	3	GrayValue-HU_5_ROIType	Private
0013	1347			UT	GrayValue-HU_5_ROICoordinates	(1288, 904), (1288, 1004), (1388, 904), (1388, 1004)	1	Private	3	GrayValue-HU_5_ROICoordinates	Private
0013	1348			LO	GrayValueROIMean_5	2049.28	1	Private	3	GrayValueROIMean_5	Private
0013	1349			LO	GrayValueROIMin_5	1932	1	Private	3	GrayValueROIMin_5	Private
0013	1350			LO	GrayValueROIMax_5	2240	1	Private	3	GrayValueROIMax_5	Private
0013	1351			LO	GrayValueROIStdDev_5	155.452	1	Private	3	GrayValueROIStdDev_5	Private
0013	1352			LO	HUROIMean_5	1025.28	1	Private	3	GrayValueHUMean_5	Private
0013	1353			LO	HUROIMin_5	908	1	Private	3	GrayValueHUMin_5	Private
0013	1354			UT	HUROIMax_5	1216	1	Private	3	GrayValueHUMax_5	Private
0013	1355			LO	HUROIStdDev_5	155.452	1	Private	3	GrayValueHUStdDev_5	Private
0013	1400			SQ	HUCalibrationSequence	HU Calibration Sequence	1	Private	3	HUCalibrationSequence	Private
0013	1401			LO	DICOCH-HUCalRef	WaterPhantom	1	Private	3	DICOCH-HUCalRef	Private
0013	1402			LO	MassAttenData	NIST XCOM	1	Private	3	MassAttenData	Private
0013	1403			UT	MassAttenDataSrc	https://physics.nist.gov/PhysRefData/Xcom/html/xcom1.html	1	Private	3	MassAttenDataSrc	Private
0013	1404			LO	DICOCH_-HUCalibrationRescaleSlope	1	1	Private	3	DICOCH_-HUCalibrationRescaleSlope	Private
0013	1405			LO	DICOCH_-HUCalibrationRescaleIntercept	-1024	1	Private	3	DICOCH_-HUCalibrationRescaleIntercept	Private
0013	1406			LO	DICOCH_-HUCalibrationRescaleType	CH-HU_NRICH	1	Private	3	DICOCH_-HUCalibrationRescaleType	Private
0013	1500			SQ	IIIFInternationalNormLinkSequence	IIIF \ International Norm Link Sequence	1	Private	3	IIIFInternationalNormLinkSequence	Private
0013	1501			UT	IIIFManifestURI	https://song-jung-il.github.io/Public_image/manifest_slice1177.json	1	Private	3	IIIFManifestURI	Private
0013	1502			UT	IIIFImageServiceURI	https://github.com/SONG-JUNG-IL/Public_image/blob/main/slice1177.jpg	1	Private	3	IIIFImageServiceURI	Private
0013	1503			LO	IIIFComplianceLevel	LEVEL1	1	Private	3	IIIFComplianceLevel	Private
0013	1504			LO	IIIFViewerURImirador	https://projectmirador.org/demo/	1	Private	3	IIIFViewerURImirador	Private
0013	1505			LO	OpenLicenseStatement	PUBLIC	1	Private	3	OpenLicenseStatement	Private
0013	1600			SQ	SecurityAccessSequence	Security \ Access Sequence	1	Private	3	SecurityAccessSequence	Private
0013	1601			LO	AccessLevel	PUBLIC	1	Private	3	AccessLevel	Private
0013	1602			DA	EmbargoEndDate	20250101	1	Private	3	EmbargoEndDate	Private
0013	1603			LO	EncryptionMethod	AES-256-GCM	1	Private	3	EncryptionMethod	Private
0013	1604			LO	HashAlgorithm	SHA-256	1	Private	3	HashAlgorithm	Private
0013	1605			LO	DataChecksum	16 byte MD5	1	Private	3	DataChecksum	Private
0013	1606			LO	LicenseType	NRICH-INT-DATA v1	1	Private	3	LicenseType	Private
0013	1607			LO	AuthorizedUserID	DICOCH_NRICH by SONG JUNG IL	1	Private	3	AuthorizedUserID	Private
0013	1608			UT	AccessAuditTrail	Created:20250613;Accessed:20250613	1	Private	3	AccessAuditTrail	Private
0013	1700			SQ	DICOCH_X-ray CR Sequence	DICOCH_X-ray CR Sequence	1	Private	3	DICOCH_X-ray CR Sequence	Private
0013	1701			CS	BodyPartExamined		1	Private	2	Body part examined (CR Series) use PS3.16 Annex L terms (e.g., CHEST, HAND).	Private
0013	1702			DS	KVP		1	Private	3		Private
0013	1703			LO	PlateID		1	Private	3	ID/serial number of the sensing plate.	Private
0013	1704			LO	SoftwareVersions		1	Private	3		Private
0013	1705			LO	ProtocolName		1	Private			Private
0013	1706			DS	DistanceSource-Detector		1	Private			Private
0013	1707			DS	DistanceSource-Patient		1	Private			Private
0013	1708			IS	ExposureTime		1	Private			Private
0013	1709			IS	X-rayTubeCurrent		1	Private			Private
0013	1710			IS	Exposure		1	Private			Private
0013	1711			SH	FilterType		1	Private	3	Type of filter inserted into the X-Ray beam.	Private
0013	1712			DS	ImagerPixelSpacing		1	Private			Private
0013	1713			IS	GeneratorPower		1	Private	3	Generator power (kW).	Private
0013	1714			LO	PlateType		1	Private			Private
0013	1715			LO	PhosphorType		1	Private			Private
0013	1716			LO	AcquisitionDeviceProcessingDescription		1	Private	3	Device-specific processing description.	Private
0013	1717			LO	AcquisitionDeviceProcessingCode		1	Private	3	Device-specific processing code.	Private
0013	1718			CS	CassetteOrientation		1	Private	3	LANDSCAPE or PORTRAIT.	Private
0013	1719			CS	CassetteSize		1	Private	3	e.g., 14INX17IN, 24CMX30CM.	Private
0013	1720			CS	ViewPosition		1	Private			Private
0013	1721			DS	Sensitivity		1	Private	3	Readout sensitivity (manufacturer-specific).	Private
0013	1800			SQ	DICOCH_X-ray CT Sequence	DICOCH_X-ray CT Sequence	1	Private	3	DICOCH_X-ray CT Sequence	Private
0013	1801			DS	KVP	90	1	Private	3	KVP	Private
0013	1802			DS	DistanceSource-Detector	975	1	Private	3	DistanceSource-Detector	Private
0013	1803			DS	DistanceSource-Patient	735.065	1	Private	3	DistanceSource-Patient	Private
0013	1804			DS	GantryDetectorTilt	0	1	Private	3	GantryDetectorTilt	Private
0013	1805			IS	ExposureTime	350	1	Private	3	ExposureTime	Private
0013	1806			IS	X-rayTubeCurrent	200	1	Private	3	X-rayTubeCurrent	Private
0013	1807			IS	Exposure	6	1	Private	3	Exposure	Private
0013	1808			DS	FocalSpot(s)	0.004	1	Private	3	FocalSpot(s)	Private
0013	1809			CS	FilterMaterial	COPPER	1	Private	3	FilterMaterial	Private
0013	1810			FD	TableFeedperRotation	0.019531	1	Private	3	TableFeedperRotation	Private
0013	1811			CS	ReconstructionAlgorithm	FBP	1	Private	3	ReconstructionAlgorithm	Private
0013	1900			SQ	DICOCHPrivateTagSequence	DICOCH Private Tag DICOCH = Digital Imaging & Communications for Cultural Heritage	1	Private	3	DICOCHPrivateTagSequence	Private
0013	1901			UT	README_DICOCH_Private_Tags		1	Private	3	README_DICOCH_Private_Tags	Private
0013	1902			UT	DICOCH_private_dict		1	Private	3	DICOCH_private_dict	Private
0018	0050			DS	SliceThickness	0.127204	1	Image	3	SliceThickness	Public
0018	0060			DS	KVP	90	1	Image	3	KVP	Public
0018	0088			DS	SpacingBetweenSlices	0.127204	1	Image	3	SpacingBetweenSlices	Public
0018	1030			LO	ProtocolName	DICOCH_NRICH by SONG JUNG IL	1	Image	3	ProtocolName	Public
0018	1110			DS	DistanceSource-Detector		1	Image	3	DistanceSource-Detector	Public
0018	1111			DS	DistanceSource-Patient		1	Image	3	DistanceSource-Patient	Public
0018	1120			DS	GantryDetectorTilt		1	Image	3	GantryDetectorTilt	Public
0018	1150			IS	ExposureTime		1	Image	3	ExposureTime	Public
0018	1151			IS	X-rayTubeCurrent		1	Image	3	X-rayTubeCurrent	Public
0018	1152			IS	Exposure		1	Image	3	Exposure	Public
0018	1190			DS	FocalSpot(s)		1	Image	3	FocalSpot(s)	Public
0018	1210			SH	ConvolutionKernel	STANDARD	1	Image	3	ConvolutionKernel	Public
0018	5100			CS	PatientPosition	HFS	1	Image	3	PatientPosition	Public
0018	9310			FD	TableFeedperRotation	0.019531	1	Image	3	TableFeedperRotation	Public
0020	000D			UI	StudyInstanceUID	1.2.276.0.7230010.3.1.4.3719806279.3380.1645512104.8639	1	Image	3	StudyInstanceUID	Public
0020	000E			UI	SeriesInstanceUID	1.2.276.0.7230010.3.1.4.3719806279.3380.1645512104.8640	1	Image	3	SeriesInstanceUID	Public
0020	0010			SH	StudyID	1	1	Image	3	StudyID	Public
0020	0011			IS	SeriesNumber	1	1	Image	3	SeriesNumber	Public
0020	0012			IS	AcquisitionNumber	1177	1	Image	3	AcquisitionNumber	Public
0020	0013			IS	InstanceNumber	1177	1	Image	3	InstanceNumber	Public
0020	0032			DS	ImagePositionPatient	0\0\0	1	Image	1	ImagePositionPatient	Public
0020	0037			DS	ImageOrientationPatient	1\0\0\0\1\0	1	Image	1	ImageOrientationPatient	Public
0020	0060			CS	Laterality	R	1	Image	3	Laterality	Public
0020	1040			LO	PositionReferenceIndicator		1	Image	3	PositionReferenceIndicator	Public
0020	1041			DS	SliceLocation	149.719	1	Image	3	SliceLocation	Public
0028	0002			US	SamplesperPixel	1	1	Image	3	SamplesperPixel	Public
0028	0004			CS	PhotometricInterpretation	MONOCHROME2	1	Image	3	PhotometricInterpretation	Public
0028	0010			US	Rows	2048	1	Image	3	Rows	Public
0028	0011			US	Columns	2048	1	Image	3	Columns	Public
0028	0030			DS	PixelSpacing	0.155671\0.155671	1	Image	1	PixelSpacing	Public
0028	0100			US	BitsAllocated	16	1	Image	3	BitsAllocated	Public
0028	0101			US	BitsStored	16	1	Image	3	BitsStored	Public
0028	0102			US	HighBit	15	1	Image	3	HighBit	Public
0028	0103			US	PixelRepresentation	1	1	Image	3	PixelRepresentation	Public
0028	1050			DS	WindowCenter	3337	1	Image	3	WindowCenter	Public
0028	1051			DS	WindowWidth	99720	1	Image	3	WindowWidth	Public
0028	1052			DS	RescaleIntercept		1	Image	3	RescaleIntercept	Public		-1024
0028	1053			DS	RescaleSlope		1	Image	3	RescaleSlope	Public	1
0028	1054			LO	RescaleType	HU	1	Image	3	RescaleType	Public			HU
7FE0	0010			OW	PixelData	<Binary Pixel Data>	1	Image	3	PixelData	Public
