# Supplementary material for: A Pipeline Integrating Cultural Heritage X-ray CR/CT Data Using Digital Imaging and Communications in Medicine
Source: Research Square preprint supplement (doi:10.21203/rs.3.rs-8413368/v1), 2026-01-16
Supplement: Supplementary file 61 [file tags_20250913.xlsx]

## Sheet: Sheet1
file	tag	vr	keyword	value
DCM_test_CT_각시_slice1177.dcm	(0008,0016)	UI	SOPClassUID	1.2.840.10008.5.1.4.1.1.2
DCM_test_CT_각시_slice1177.dcm	(0008,0018)	UI	SOPInstanceUID	1.2.276.0.7230010.3.1.4.3719806279.3380.1645512530.9818
DCM_test_CT_각시_slice1177.dcm	(0008,0020)	DA	StudyDate	20220222
DCM_test_CT_각시_slice1177.dcm	(0008,0030)	TM	StudyTime	154144.0
DCM_test_CT_각시_slice1177.dcm	(0008,0060)	CS	Modality	CT
DCM_test_CT_각시_slice1177.dcm	(0008,0070)	LO	Manufacturer	SEC Engineering
DCM_test_CT_각시_slice1177.dcm	(0008,1030)	LO	StudyDescription
DCM_test_CT_각시_slice1177.dcm	(0008,103E)	LO	SeriesDescription
DCM_test_CT_각시_slice1177.dcm	(0008,1070)	PN	OperatorsName
DCM_test_CT_각시_slice1177.dcm	(0010,0010)	PN	PatientName	SfxImage2D
DCM_test_CT_각시_slice1177.dcm	(0018,0050)	DS	SliceThickness	0.127204
DCM_test_CT_각시_slice1177.dcm	(0018,0060)	DS	KVP	0.000000
DCM_test_CT_각시_slice1177.dcm	(0018,1110)	DS	DistanceSourceToDetector	0.000000
DCM_test_CT_각시_slice1177.dcm	(0018,1111)	DS	DistanceSourceToPatient	0.000000
DCM_test_CT_각시_slice1177.dcm	(0018,1150)	IS	ExposureTime	0.000000
DCM_test_CT_각시_slice1177.dcm	(0018,1151)	IS	XRayTubeCurrent	0.000000
DCM_test_CT_각시_slice1177.dcm	(0018,1152)	IS	Exposure	0.000000
DCM_test_CT_각시_slice1177.dcm	(0018,1190)	DS	FocalSpots	0.000000
DCM_test_CT_각시_slice1177.dcm	(0020,000D)	UI	StudyInstanceUID	1.2.276.0.7230010.3.1.4.3719806279.3380.1645512104.8639
DCM_test_CT_각시_slice1177.dcm	(0020,000E)	UI	SeriesInstanceUID	1.2.276.0.7230010.3.1.4.3719806279.3380.1645512104.8640
DCM_test_CT_각시_slice1177.dcm	(0020,0013)	IS	InstanceNumber	1177
DCM_test_CT_각시_slice1177.dcm	(0020,0032)	DS	ImagePositionPatient	[-159.328949, 159.328949, -19.525833]
DCM_test_CT_각시_slice1177.dcm	(0020,0037)	DS	ImageOrientationPatient	[1.000000, 0.000000, 0.000000, 0.000000, -1.000000, 0.000000]
DCM_test_CT_각시_slice1177.dcm	(0020,1041)	DS	SliceLocation	149.719269
DCM_test_CT_각시_slice1177.dcm	(0028,0002)	US	SamplesPerPixel	1
DCM_test_CT_각시_slice1177.dcm	(0028,0004)	CS	PhotometricInterpretation	MONOCHROME2
DCM_test_CT_각시_slice1177.dcm	(0028,0010)	US	Rows	2048
DCM_test_CT_각시_slice1177.dcm	(0028,0011)	US	Columns	2048
DCM_test_CT_각시_slice1177.dcm	(0028,0030)	DS	PixelSpacing	[0.155671, 0.155671]
DCM_test_CT_각시_slice1177.dcm	(0028,0034)	IS	PixelAspectRatio	[1, 1]
DCM_test_CT_각시_slice1177.dcm	(0028,0100)	US	BitsAllocated	16
DCM_test_CT_각시_slice1177.dcm	(0028,0101)	US	BitsStored	16
DCM_test_CT_각시_slice1177.dcm	(0028,0102)	US	HighBit	15
DCM_test_CT_각시_slice1177.dcm	(0028,0103)	US	PixelRepresentation	1
