# Supplementary material for: A Pipeline Integrating Cultural Heritage X-ray CR/CT Data Using Digital Imaging and Communications in Medicine
Source: Research Square preprint supplement (doi:10.21203/rs.3.rs-8413368/v1), 2026-01-16
Supplement: Supplementary file 69 [file tags_20250915.xlsx]

## Sheet: Sheet1
file	tag	vr	keyword	value
CT_slice1177_Andong Hahoe Mask.dcm	(0008,0005)	CS	SpecificCharacterSet	ISO_IR 192
CT_slice1177_Andong Hahoe Mask.dcm	(0008,0008)	CS	Image Type	['DERIVED', 'PRIMARY', 'AXIAL']
CT_slice1177_Andong Hahoe Mask.dcm	(0008,0016)	UI	SOPClassUID	1.2.840.10008.5.1.4.1.1.2
CT_slice1177_Andong Hahoe Mask.dcm	(0008,0018)	UI	SOPInstanceUID	1.2.276.0.7230010.3.1.4.3719806279.3380.1645512530.9818
CT_slice1177_Andong Hahoe Mask.dcm	(0008,0020)	DA	StudyDate	20220222
CT_slice1177_Andong Hahoe Mask.dcm	(0008,0021)	DA	SeriesDate	20220222
CT_slice1177_Andong Hahoe Mask.dcm	(0008,0023)	DA	ContentDate	20220222
CT_slice1177_Andong Hahoe Mask.dcm	(0008,0030)	TM	StudyTime	154144
CT_slice1177_Andong Hahoe Mask.dcm	(0008,0031)	TM	SeriesTime	154144
CT_slice1177_Andong Hahoe Mask.dcm	(0008,0033)	TM	ContentTime	154144
CT_slice1177_Andong Hahoe Mask.dcm	(0008,0050)	SH	AccessionNumber	1177
CT_slice1177_Andong Hahoe Mask.dcm	(0008,0060)	CS	Modality	CT
CT_slice1177_Andong Hahoe Mask.dcm	(0008,0070)	LO	Manufacturer	NRICH by SONG JUNG IL
CT_slice1177_Andong Hahoe Mask.dcm	(0008,0080)	LO	Institution Name	NRICH
CT_slice1177_Andong Hahoe Mask.dcm	(0008,0090)	PN	ReferringPhysicianName	KOREA^Object
CT_slice1177_Andong Hahoe Mask.dcm	(0008,1030)	LO	StudyDescription	X-ray CT scan of cultural heritage
CT_slice1177_Andong Hahoe Mask.dcm	(0008,103E)	LO	SeriesDescription	National Treasure No. 21 Andong Hahoe Mask
CT_slice1177_Andong Hahoe Mask.dcm	(0008,1090)	LO	Manufacturer’sModelName	DICOCH Converter v3.3
CT_slice1177_Andong Hahoe Mask.dcm	(0008,2111)	ST	DerivationDescription	slice1177; 2048*2048; dcm to TIFF
CT_slice1177_Andong Hahoe Mask.dcm	(0010,0010)	PN	PatientName	KOREAObject^HeritageObject
CT_slice1177_Andong Hahoe Mask.dcm	(0010,0020)	LO	PatientID	OBJ-CT-TEST-HAHOE
CT_slice1177_Andong Hahoe Mask.dcm	(0010,0030)	DA	PatientBirthDate	20220222
CT_slice1177_Andong Hahoe Mask.dcm	(0010,0040)	CS	PatientSex	O
CT_slice1177_Andong Hahoe Mask.dcm	(0013,0010)	LO		DICOCH_NRICH by SONG JUNG IL
CT_slice1177_Andong Hahoe Mask.dcm	(0013,0011)	LO		HeritageMetadataSequence
CT_slice1177_Andong Hahoe Mask.dcm	(0013,0012)	LO		GrayValue-HU_PointSequence
CT_slice1177_Andong Hahoe Mask.dcm	(0013,0013)	LO		DICOCH_GrayValue-HU_ROISequence
CT_slice1177_Andong Hahoe Mask.dcm	(0013,0014)	LO		HUCalibrationSequence
CT_slice1177_Andong Hahoe Mask.dcm	(0013,0015)	LO		IIIFInternationalNormLinkSequence
CT_slice1177_Andong Hahoe Mask.dcm	(0013,0016)	LO		SecurityAccessSequence
CT_slice1177_Andong Hahoe Mask.dcm	(0013,0017)	LO		DICOCH_X-ray CR Sequence
CT_slice1177_Andong Hahoe Mask.dcm	(0013,0018)	LO		DICOCH_X-ray CT Sequence
CT_slice1177_Andong Hahoe Mask.dcm	(0013,0019)	LO		DICOCHPrivateTagSequence
CT_slice1177_Andong Hahoe Mask.dcm	(0013,1100)	SQ		[]
CT_slice1177_Andong Hahoe Mask.dcm	(0013,1101)	LO		Andong Hahoe Yangban Mask
CT_slice1177_Andong Hahoe Mask.dcm	(0013,1102)	LO		KR-AHYM-NT121-YB
CT_slice1177_Andong Hahoe Mask.dcm	(0013,1103)	LO		Goryeo Dynasty, 12th–13th
CT_slice1177_Andong Hahoe Mask.dcm	(0013,1104)	UT		Salix spp.
CT_slice1177_Andong Hahoe Mask.dcm	(0013,1105)	UT		Surface_Crack_3
CT_slice1177_Andong Hahoe Mask.dcm	(0013,1106)	LO		NationalTreasure NO.121
CT_slice1177_Andong Hahoe Mask.dcm	(0013,1107)	UT		X-ray Non-destructive Precision Documentation and Internal Structure Analysis
CT_slice1177_Andong Hahoe Mask.dcm	(0013,1108)	UT		National Research Institute of Cultural Heritage, NRICH
CT_slice1177_Andong Hahoe Mask.dcm	(0013,1109)	UT		132 Munji-ro, Yuseong-gu, Daejeon, South Korea
CT_slice1177_Andong Hahoe Mask.dcm	(0013,1200)	SQ		[]
CT_slice1177_Andong Hahoe Mask.dcm	(0013,1201)	LO		MASK_1_WoodMask_Slice1177_Air
CT_slice1177_Andong Hahoe Mask.dcm	(0013,1202)	LO		(x=124, y=140)
CT_slice1177_Andong Hahoe Mask.dcm	(0013,1203)	LO		0
CT_slice1177_Andong Hahoe Mask.dcm	(0013,1204)	LO		-1024
CT_slice1177_Andong Hahoe Mask.dcm	(0013,1205)	LO		MASK_2_WoodMask_Slice1177_Background
CT_slice1177_Andong Hahoe Mask.dcm	(0013,1206)	LO		(x=416, y=472)
CT_slice1177_Andong Hahoe Mask.dcm	(0013,1207)	LO		2000
CT_slice1177_Andong Hahoe Mask.dcm	(0013,1208)	LO		976
CT_slice1177_Andong Hahoe Mask.dcm	(0013,1209)	LO		MASK_3_WoodMask_Slice1177_Wood Core
CT_slice1177_Andong Hahoe Mask.dcm	(0013,1210)	LO		(x=568, y=848)
CT_slice1177_Andong Hahoe Mask.dcm	(0013,1211)	LO		2008
CT_slice1177_Andong Hahoe Mask.dcm	(0013,1212)	LO		984
CT_slice1177_Andong Hahoe Mask.dcm	(0013,1213)	LO		MASK_4_WoodMask_Slice1177_Pgment
CT_slice1177_Andong Hahoe Mask.dcm	(0013,1214)	LO		(x=680, y=676)
CT_slice1177_Andong Hahoe Mask.dcm	(0013,1215)	LO		2092
CT_slice1177_Andong Hahoe Mask.dcm	(0013,1216)	LO		1068
CT_slice1177_Andong Hahoe Mask.dcm	(0013,1217)	LO		MASK_6_WoodMask_Slice1177_MetalNail
CT_slice1177_Andong Hahoe Mask.dcm	(0013,1218)	LO		(x=1328, y=952)
CT_slice1177_Andong Hahoe Mask.dcm	(0013,1219)	LO		2113
CT_slice1177_Andong Hahoe Mask.dcm	(0013,1220)	LO		1098
CT_slice1177_Andong Hahoe Mask.dcm	(0013,1300)	SQ		[]
CT_slice1177_Andong Hahoe Mask.dcm	(0013,1301)	LO		MASK_1_ROI_WoodMask_Slice1177_Air
CT_slice1177_Andong Hahoe Mask.dcm	(0013,1302)	LO		Polygon
CT_slice1177_Andong Hahoe Mask.dcm	(0013,1303)	UT		ROI_point(x=148, y=140), ROI_px(W=64, H=64)
CT_slice1177_Andong Hahoe Mask.dcm	(0013,1304)	LO		0
CT_slice1177_Andong Hahoe Mask.dcm	(0013,1305)	LO		0
CT_slice1177_Andong Hahoe Mask.dcm	(0013,1306)	LO		0
CT_slice1177_Andong Hahoe Mask.dcm	(0013,1307)	LO		0
CT_slice1177_Andong Hahoe Mask.dcm	(0013,1308)	LO		-1024
CT_slice1177_Andong Hahoe Mask.dcm	(0013,1309)	LO		-1024
CT_slice1177_Andong Hahoe Mask.dcm	(0013,1310)	UT		-1024
CT_slice1177_Andong Hahoe Mask.dcm	(0013,1311)	LO		0
CT_slice1177_Andong Hahoe Mask.dcm	(0013,1312)	LO		MASK_2_ROI_WoodMask_Slice1177_Background
CT_slice1177_Andong Hahoe Mask.dcm	(0013,1313)	LO		Polygon
CT_slice1177_Andong Hahoe Mask.dcm	(0013,1314)	UT		ROI_point(x=440, y=496), ROI_px(W=64, H=64)
CT_slice1177_Andong Hahoe Mask.dcm	(0013,1315)	LO		1999.893066
CT_slice1177_Andong Hahoe Mask.dcm	(0013,1316)	LO		1999
CT_slice1177_Andong Hahoe Mask.dcm	(0013,1317)	LO		2000
CT_slice1177_Andong Hahoe Mask.dcm	(0013,1318)	LO		0.309029
CT_slice1177_Andong Hahoe Mask.dcm	(0013,1319)	LO		975.893066
CT_slice1177_Andong Hahoe Mask.dcm	(0013,1320)	LO		975
CT_slice1177_Andong Hahoe Mask.dcm	(0013,1321)	UT		976
CT_slice1177_Andong Hahoe Mask.dcm	(0013,1322)	LO		0.309029
CT_slice1177_Andong Hahoe Mask.dcm	(0013,1323)	LO		MASK_3_ROI_WoodMask_Slice1177_Wood Core
CT_slice1177_Andong Hahoe Mask.dcm	(0013,1324)	LO		Polygon
CT_slice1177_Andong Hahoe Mask.dcm	(0013,1325)	UT		ROI_point(x=528, y=808), ROI_px(W=64, H=64)
CT_slice1177_Andong Hahoe Mask.dcm	(0013,1326)	LO		2007.664307
CT_slice1177_Andong Hahoe Mask.dcm	(0013,1327)	LO		2006
CT_slice1177_Andong Hahoe Mask.dcm	(0013,1328)	LO		2009
CT_slice1177_Andong Hahoe Mask.dcm	(0013,1329)	LO		0.492478
CT_slice1177_Andong Hahoe Mask.dcm	(0013,1330)	LO		983.664307
CT_slice1177_Andong Hahoe Mask.dcm	(0013,1331)	LO		982
CT_slice1177_Andong Hahoe Mask.dcm	(0013,1332)	UT		985
CT_slice1177_Andong Hahoe Mask.dcm	(0013,1333)	LO		0.492478
CT_slice1177_Andong Hahoe Mask.dcm	(0013,1334)	LO		MASK_4_WoodMask_Slice1177_Pgment
CT_slice1177_Andong Hahoe Mask.dcm	(0013,1335)	LO		Polygon
CT_slice1177_Andong Hahoe Mask.dcm	(0013,1336)	UT		ROI_point(x=668, y=648), ROI_px(W=64, H=64)
CT_slice1177_Andong Hahoe Mask.dcm	(0013,1337)	LO		2010.585938
CT_slice1177_Andong Hahoe Mask.dcm	(0013,1338)	LO		1993
CT_slice1177_Andong Hahoe Mask.dcm	(0013,1339)	LO		2161
CT_slice1177_Andong Hahoe Mask.dcm	(0013,1340)	LO		17.791872
CT_slice1177_Andong Hahoe Mask.dcm	(0013,1341)	LO		986.585938
CT_slice1177_Andong Hahoe Mask.dcm	(0013,1342)	LO		969
CT_slice1177_Andong Hahoe Mask.dcm	(0013,1343)	UT		1137
CT_slice1177_Andong Hahoe Mask.dcm	(0013,1344)	LO		17.791874
CT_slice1177_Andong Hahoe Mask.dcm	(0013,1345)	LO		MASK_5_WoodMask_Slice1177_MetalNail_Artfct
CT_slice1177_Andong Hahoe Mask.dcm	(0013,1346)	LO		Polygon
CT_slice1177_Andong Hahoe Mask.dcm	(0013,1347)	UT		ROI_point(x=1384, y=992), ROI_px(W=64, H=64)
CT_slice1177_Andong Hahoe Mask.dcm	(0013,1348)	LO		1992.13501
CT_slice1177_Andong Hahoe Mask.dcm	(0013,1349)	LO		1924
CT_slice1177_Andong Hahoe Mask.dcm	(0013,1350)	LO		2051
CT_slice1177_Andong Hahoe Mask.dcm	(0013,1351)	LO		14.414165
CT_slice1177_Andong Hahoe Mask.dcm	(0013,1352)	LO		968.13501
CT_slice1177_Andong Hahoe Mask.dcm	(0013,1353)	LO		900
CT_slice1177_Andong Hahoe Mask.dcm	(0013,1354)	UT		1027
CT_slice1177_Andong Hahoe Mask.dcm	(0013,1355)	LO		14.414165
CT_slice1177_Andong Hahoe Mask.dcm	(0013,1356)	LO		MASK_5_WoodMask_Slice1177_MetalNail_Artfct
CT_slice1177_Andong Hahoe Mask.dcm	(0013,1357)	LO		Polygon
CT_slice1177_Andong Hahoe Mask.dcm	(0013,1358)	UT		ROI_point(x=1304, y=920), ROI_px(W=64, H=64)
CT_slice1177_Andong Hahoe Mask.dcm	(0013,1359)	LO		2066.185303
CT_slice1177_Andong Hahoe Mask.dcm	(0013,1360)	LO		2019
CT_slice1177_Andong Hahoe Mask.dcm	(0013,1361)	LO		2181
CT_slice1177_Andong Hahoe Mask.dcm	(0013,1362)	LO		34.452832
CT_slice1177_Andong Hahoe Mask.dcm	(0013,1363)	LO		1042.185303
CT_slice1177_Andong Hahoe Mask.dcm	(0013,1364)	LO		995
CT_slice1177_Andong Hahoe Mask.dcm	(0013,1365)	UT		1157
CT_slice1177_Andong Hahoe Mask.dcm	(0013,1366)	LO		34.452831
CT_slice1177_Andong Hahoe Mask.dcm	(0013,1400)	SQ		[]
CT_slice1177_Andong Hahoe Mask.dcm	(0013,1401)	LO		WaterPhantom
CT_slice1177_Andong Hahoe Mask.dcm	(0013,1402)	LO		NIST XCOM
CT_slice1177_Andong Hahoe Mask.dcm	(0013,1403)	UT		https://physics.nist.gov/PhysRefData/Xcom/html/xcom1.html
CT_slice1177_Andong Hahoe Mask.dcm	(0013,1404)	LO		1
CT_slice1177_Andong Hahoe Mask.dcm	(0013,1405)	LO		-1024
CT_slice1177_Andong Hahoe Mask.dcm	(0013,1406)	LO		HU_DICOM
CT_slice1177_Andong Hahoe Mask.dcm	(0013,1500)	SQ		[]
CT_slice1177_Andong Hahoe Mask.dcm	(0013,1501)	UT		https://song-jung-il.github.io/Public_image/CT_slice1177_Andong Hahoe Mask.json
CT_slice1177_Andong Hahoe Mask.dcm	(0013,1502)	UT		https://github.com/SONG-JUNG-IL/Public_image/blob/main/CT_slice1177_Andong Hahoe Mask.jpg
CT_slice1177_Andong Hahoe Mask.dcm	(0013,1503)	LO		LEVEL1
CT_slice1177_Andong Hahoe Mask.dcm	(0013,1504)	LO		https://projectmirador.org/demo/
CT_slice1177_Andong Hahoe Mask.dcm	(0013,1505)	LO		PUBLIC
CT_slice1177_Andong Hahoe Mask.dcm	(0013,1600)	SQ		[]
CT_slice1177_Andong Hahoe Mask.dcm	(0013,1601)	LO		PUBLIC
CT_slice1177_Andong Hahoe Mask.dcm	(0013,1602)	DA		20250101
CT_slice1177_Andong Hahoe Mask.dcm	(0013,1603)	LO		AES-256-GCM
CT_slice1177_Andong Hahoe Mask.dcm	(0013,1604)	LO		SHA-256
CT_slice1177_Andong Hahoe Mask.dcm	(0013,1605)	LO		16 byte MD5
CT_slice1177_Andong Hahoe Mask.dcm	(0013,1606)	LO		NRICH-INT-DATA v1
CT_slice1177_Andong Hahoe Mask.dcm	(0013,1607)	LO		DICOCH_NRICH by SONG JUNG IL
CT_slice1177_Andong Hahoe Mask.dcm	(0013,1608)	UT		Created:20250613;Accessed:20250613
CT_slice1177_Andong Hahoe Mask.dcm	(0013,1700)	SQ		[]
CT_slice1177_Andong Hahoe Mask.dcm	(0013,1701)	LO		NONE
CT_slice1177_Andong Hahoe Mask.dcm	(0013,1702)	LO		NONE
CT_slice1177_Andong Hahoe Mask.dcm	(0013,1703)	LO		NONE
CT_slice1177_Andong Hahoe Mask.dcm	(0013,1704)	LO		NONE
CT_slice1177_Andong Hahoe Mask.dcm	(0013,1705)	LO		NONE
CT_slice1177_Andong Hahoe Mask.dcm	(0013,1706)	LO		NONE
CT_slice1177_Andong Hahoe Mask.dcm	(0013,1707)	LO		NONE
CT_slice1177_Andong Hahoe Mask.dcm	(0013,1708)	LO		NONE
CT_slice1177_Andong Hahoe Mask.dcm	(0013,1709)	LO		NONE
CT_slice1177_Andong Hahoe Mask.dcm	(0013,1710)	LO		NONE
CT_slice1177_Andong Hahoe Mask.dcm	(0013,1711)	LO		NONE
CT_slice1177_Andong Hahoe Mask.dcm	(0013,1712)	LO		NONE
CT_slice1177_Andong Hahoe Mask.dcm	(0013,1713)	LO		NONE
CT_slice1177_Andong Hahoe Mask.dcm	(0013,1714)	LO		NONE
CT_slice1177_Andong Hahoe Mask.dcm	(0013,1715)	LO		NONE
CT_slice1177_Andong Hahoe Mask.dcm	(0013,1716)	LO		NONE
CT_slice1177_Andong Hahoe Mask.dcm	(0013,1717)	LO		NONE
CT_slice1177_Andong Hahoe Mask.dcm	(0013,1718)	LO		NONE
CT_slice1177_Andong Hahoe Mask.dcm	(0013,1719)	LO		NONE
CT_slice1177_Andong Hahoe Mask.dcm	(0013,1720)	LO		NONE
CT_slice1177_Andong Hahoe Mask.dcm	(0013,1721)	LO		NONE
CT_slice1177_Andong Hahoe Mask.dcm	(0013,1800)	SQ		[]
CT_slice1177_Andong Hahoe Mask.dcm	(0013,1801)	DS		90
CT_slice1177_Andong Hahoe Mask.dcm	(0013,1802)	DS		975
CT_slice1177_Andong Hahoe Mask.dcm	(0013,1803)	DS		735.065
CT_slice1177_Andong Hahoe Mask.dcm	(0013,1804)	DS		0
CT_slice1177_Andong Hahoe Mask.dcm	(0013,1805)	IS		350
CT_slice1177_Andong Hahoe Mask.dcm	(0013,1806)	IS		200
CT_slice1177_Andong Hahoe Mask.dcm	(0013,1807)	IS		6
CT_slice1177_Andong Hahoe Mask.dcm	(0013,1808)	DS		0.004
CT_slice1177_Andong Hahoe Mask.dcm	(0013,1809)	CS		COPPER
CT_slice1177_Andong Hahoe Mask.dcm	(0013,1810)	FD		0.019531
CT_slice1177_Andong Hahoe Mask.dcm	(0013,1811)	CS		FBP
CT_slice1177_Andong Hahoe Mask.dcm	(0013,1900)	SQ		[]
CT_slice1177_Andong Hahoe Mask.dcm	(0013,1901)	UT		https://song-jung-il.github.io/Public_image/README_DICOCH_Private_Tags.txt
CT_slice1177_Andong Hahoe Mask.dcm	(0013,1902)	UT		https://song-jung-il.github.io/Public_image/CT_DICOCH_private_dict.txt
CT_slice1177_Andong Hahoe Mask.dcm	(0018,0050)	DS	SliceThickness	0.127204
CT_slice1177_Andong Hahoe Mask.dcm	(0018,0060)	DS	KVP	90
CT_slice1177_Andong Hahoe Mask.dcm	(0018,0088)	DS	SpacingBetweenSlices	0.127204
CT_slice1177_Andong Hahoe Mask.dcm	(0018,1030)	LO	ProtocolName	DICOCH_NRICH by SONG JUNG IL
CT_slice1177_Andong Hahoe Mask.dcm	(0018,1150)	IS	ExposureTime	350
CT_slice1177_Andong Hahoe Mask.dcm	(0018,1151)	IS	X-rayTubeCurrent	200
CT_slice1177_Andong Hahoe Mask.dcm	(0018,1152)	IS	Exposure	6
CT_slice1177_Andong Hahoe Mask.dcm	(0018,1210)	SH	ConvolutionKernel	STANDARD
CT_slice1177_Andong Hahoe Mask.dcm	(0018,5100)	CS	PatientPosition	HFS
CT_slice1177_Andong Hahoe Mask.dcm	(0018,9310)	FD	TableFeedperRotation	0.019531
CT_slice1177_Andong Hahoe Mask.dcm	(0020,000D)	UI	StudyInstanceUID	1.2.276.0.7230010.3.1.4.3719806279.3380.1645512104.8639
CT_slice1177_Andong Hahoe Mask.dcm	(0020,000E)	UI	SeriesInstanceUID	1.2.276.0.7230010.3.1.4.3719806279.3380.1645512104.8640
CT_slice1177_Andong Hahoe Mask.dcm	(0020,0010)	SH	StudyID	1
CT_slice1177_Andong Hahoe Mask.dcm	(0020,0011)	IS	SeriesNumber	1
CT_slice1177_Andong Hahoe Mask.dcm	(0020,0012)	IS	AcquisitionNumber	1177
CT_slice1177_Andong Hahoe Mask.dcm	(0020,0013)	IS	InstanceNumber	1177
CT_slice1177_Andong Hahoe Mask.dcm	(0020,0032)	DS	ImagePositionPatient	[-159.328949, 159.328949, -19.525833]
CT_slice1177_Andong Hahoe Mask.dcm	(0020,0037)	DS	ImageOrientationPatient	[1.000000, 0.000000, 0.000000, 0.000000, -1.000000, 0.000000]
CT_slice1177_Andong Hahoe Mask.dcm	(0020,0052)	UI	FrameofReference UID	1.2.276.0.7230010.3.1.4.3719806279.3380.1645512104.8641
CT_slice1177_Andong Hahoe Mask.dcm	(0020,0060)	CS	Laterality	R
CT_slice1177_Andong Hahoe Mask.dcm	(0020,1040)	LO	PositionReferenceIndicator	R
CT_slice1177_Andong Hahoe Mask.dcm	(0020,1041)	DS	SliceLocation	149.719269
CT_slice1177_Andong Hahoe Mask.dcm	(0028,0002)	US	SamplesperPixel	1
CT_slice1177_Andong Hahoe Mask.dcm	(0028,0004)	CS	PhotometricInterpretation	MONOCHROME2
CT_slice1177_Andong Hahoe Mask.dcm	(0028,0010)	US	Rows	2048
CT_slice1177_Andong Hahoe Mask.dcm	(0028,0011)	US	Columns	2048
CT_slice1177_Andong Hahoe Mask.dcm	(0028,0030)	DS	PixelSpacing	[0.155671, 0.155671]
CT_slice1177_Andong Hahoe Mask.dcm	(0028,0100)	US	BitsAllocated	16
CT_slice1177_Andong Hahoe Mask.dcm	(0028,0101)	US	BitsStored	16
CT_slice1177_Andong Hahoe Mask.dcm	(0028,0102)	US	HighBit	15
CT_slice1177_Andong Hahoe Mask.dcm	(0028,0103)	US	PixelRepresentation	0
CT_slice1177_Andong Hahoe Mask.dcm	(0028,1050)	DS	WindowCenter	2317
CT_slice1177_Andong Hahoe Mask.dcm	(0028,1051)	DS	WindowWidth	68743
CT_slice1177_Andong Hahoe Mask.dcm	(0028,1052)	DS	RescaleIntercept	0
CT_slice1177_Andong Hahoe Mask.dcm	(0028,1053)	DS	RescaleSlope	1
CT_slice1177_Andong Hahoe Mask.dcm	(0028,1054)	LO	RescaleType	HU
