# Supplementary material for: A Pipeline Integrating Cultural Heritage X-ray CR/CT Data Using Digital Imaging and Communications in Medicine
Source: Research Square preprint supplement (doi:10.21203/rs.3.rs-8413368/v1), 2026-01-16
Supplement: Supplementary file 73 [file e3e3330570a52753b0221e6b.docx]

**List of Abbreviations**

| **Acronyms** | **Expansion** |
| --- | --- |
| **AAPM** | American Association of Physicists in Medicine |
| **CARE** | Collective Benefit, Authority to Control, Responsibility, and Ethics (Data Principles) |
| **CIDOC-CRM** | CIDOC Conceptual Reference Model (ISO 21127) |
| **CR** | Computed Radiography |
| **CT** | Computed Tomography |
| **DECT** | Dual-Energy Computed Tomography |
| **DICOM** | Digital Imaging and Communications in Medicine |
| **DICOCH** | Digital Imaging and Communication in Cultural Heritage (Proposed Pipeline) |
| **DICONDE** | Digital Imaging and Communication in Non-Destructive Evaluation |
| **DOI** | Digital Object Identifier |
| **DS** | Decimal String (DICOM Value Representation) |
| **EDM** | Europeana Data Model |
| **FAIR** | Findable, Accessible, Interoperable, and Reusable (Data Principles) |
| **FTIR** | Fourier Transform Infrared Spectroscopy |
| **GLAM** | Galleries, Libraries, Archives, and Museums |
| **GUI** | Graphical User Interface |
| **GVP** | Generation-Validation-Publication (Workflow) |
| **HU** | Hounsfield Unit |
| **IIIF** | International Image Interoperability Framework |
| **IOD** | Information Object Definition |
| **ISO** | International Organization for Standardization |
| **JPEG** | Joint Photographic Experts Group |
| **JSON** | JavaScript Object Notation |
| **JSONL** | JavaScript Object Notation Lines |
| **kVp** | Kilovoltage Peak |
| **LUT** | Look-Up Table |
| **MPR** | Multi-Planar Reconstruction |
| **NDE** | Non-Destructive Evaluation |
| **NDT** | Non-Destructive Testing |
| **NIST** | National Institute of Standards and Technology |
| **NRICH** | National Research Institute of Cultural Heritage |
| **PACS** | Picture Archiving and Communication System |
| **PCD-CT** | Photon-Counting Detector Computed Tomography |
| **PERSIST** | Platform to Enhance the Sustainability of the Information Society (UNESCO Guidelines) |
| **PNG** | Portable Network Graphics |
| **QA** | Quality Assurance |
| **ROI** | Region of Interest |
| **SD** | Standard Deviation |
| **SID** | Source-to-Image Distance |
| **SOD** | Source-to-Object Distance |
| **SOP** | Service-Object Pair |
| **TIFF** | Tagged Image File Format |
| **UID** | Unique Identifier |
| **URI** | Uniform Resource Identifier |
| **VM** | Value Multiplicity |
| **VOI** | Value of Interest |
| **VR** | Value Representation |
| **XCOM** | Photon Cross Sections Database (NIST) |
| **dciodvfy** | DICOM Validator Software (part of dicom3tools) |

## Tables

**Table 1. DICOCH Private Group (0013,xxxx): sequences and representative elements**

| **Tag** | **VR** | **Keyword** | **Example value** | **Description / notes** |
| --- | --- | --- | --- | --- |
| (0013,1100) | SQ | HeritageMetadataSequence | Heritage metadata root | Cultural-heritage context container. |
| (0013,1200) | SQ | GrayValue-HU_PointSequence | GrayValue-HU_PointSequence | Point-level gray/HU capture. |
| (0013,1300) | SQ | GrayValue-HU_ROISequence | ROI Gray Value Sequence | ROI-level gray/HU statistics. |
| (0013,1400) | SQ | HUCalibrationSequence | HUCalibrationSequence | Calibration references/parameters. |
| (0013,1500) | SQ | IIIFInternationalNormLinkSequence | IIIF manifest/Canvas URIs | IIIF/web linkage (manifest, image service, rights). |
| (0013,1600) | SQ | SecurityAccessSequence | Access=public; License=CC BY | Access level, rights, embargo, audit. |
| (0013,1700) | SQ | X-ray CR Sequence | — | CR-specific extension root. |
| (0013,1800) | SQ | X-ray CT Sequence | — | CT-specific extension root. |
| (0013,1900) | SQ | DICOCHPrivateTagSequence | — | Self-describing private dictionary. |

**Table 2. DICOM shared core tags (CT/CR): imaging, geometry, and display**

| **Tag** | **VR** | **Keyword** | **CT example** | **CR example** | **Role / explanation** |
| --- | --- | --- | --- | --- | --- |
| (0008,0060) | CS | Modality | CT | CR | Acquisition type; controls downstream parsing and validation. |
| (0008,0016)/(0008,0018) | UI | SOPClassUID / SOPInstanceUID | CT Image SOP + UID | CR Image SOP + UID | IOD and instance identity (critical for PACS/validation). |
| (0028,0004) | CS | PhotometricInterpretation | MONOCHROME2 | MONOCHROME2 | Grayscale polarity (black = low, white = high). |
| (0028,0010)/(0028,0011) | US | Rows / Columns | 2048 × 2048 | 12361 × 10131 | Pixel matrix dimensions (tiling, IIIF, memory planning). |
| (0028,0100)/(0101)/(0102)/(0103) | US | BitsAllocated / BitsStored / HighBit / PixelRepresentation | 16/16/15/1 | 16/16/15/1 | Quantization precision and signedness (reproducibility). |
| (0028,1050)/(0028,1051) | DS | WindowCenter / WindowWidth | 2317 / 68743 | 32768 / 65535 | Display LUT parameters (visualization hints). |
| (7FE0,0010) | OW | PixelData | (binary) | (binary) | Lossless pixel payload — the archival ground truth. |

Note**:** Even for shared tags, the semantic meanings of scales and coordinates differ by modality and must be interpreted using Tables 3 and 4.

**Table 3. CT-specific tags: 3D geometry and HU quantitation**

| **Tag** | **VR** | **Keyword** | **Example** | **Why it matters** |
| --- | --- | --- | --- | --- |
| (0028,0030) | DS | PixelSpacing | 0.155671\0.155671 | In‑plane physical scale (mm/pixel). |
| (0018,0050) | DS | SliceThickness | 0.127204 | Axial thickness (mm); basis for volumetrics. |
| (0018,0088) | DS | SpacingBetweenSlices | 0.127204 | Inter‑slice distance (mm); Z registration. |
| (0020,0032) | DS | ImagePositionPatient | −159.328949\159.328949−19.525833 | 3D origin of the slice. |
| (0020,0037) | DS | ImageOrientationPatient | 1\0\0\0−1\0 | Direction cosines (reconstruction frame). |
| (0020,0052) | UI | FrameOfReferenceUID |  | Shared 3D reference frame across slices/series. |
| (0020,1040) | LO | PositionReferenceIndicator | R | Label for coordinate interpretation. |
| (0028,1052)/(1053)/(1054) | DS/DS/LO | RescaleIntercept / RescaleSlope / RescaleType | −1024 / 1 / HU | Linear transform from stored values to HU. |
| (0018,1210) | SH | ConvolutionKernel | STANDARD | Reconstruction kernel (spatial frequency response). |
| (0018,5100) | CS | PatientPosition | HFS | Acquisition pose (affect coordinate semantics). |
| (0020,0060) | CS | Laterality | R | Side designation (conditional Type). |

**Table 4. CR-specific tags: projection geometry and device context**

| **Tag** | **VR** | **Keyword** | **Example** | **Why it matters** |
| --- | --- | --- | --- | --- |
| (0018,1164) | DS | ImagerPixelSpacing | 0.035\0.035 | Physical scale at detector; different from CT PixelSpacing. |
| (0018,5101) | CS | ViewPosition | PA | Projection/view orientation. |
| (0018,0015) | CS | BodyPartExamined | CHEST | Standardized anatomical/target label. |
| (0018,1402)/(1403) | CS/CS | CassetteOrientation / CassetteSize | PORTRAIT / 14INX17IN | Cassette geometry (FOV, distortion). |
| (0018,1004) | LO | PlateID | 2021_3401_03 | Plate traceability. |
| (0018,1260)/(1261) | LO/LO | PlateType / PhosphorType | IPU / HR 35 μm | Detector characteristics (resolution/sensitivity). |
| (0018,1160) | SH | FilterType | NONE | Beam filtration (beam quality). |
| (0018,6000) | DS | Sensitivity | 0.03 | Readout sensitivity (vendor‑specific). |
| (0020,0062) | CS | ImageLaterality | L | Left/right mark in projection. |
| (0020,0020) | CS | PatientOrientation | A | Orientation relative to device/detector (conditional). |

**Table 5. Case dataset summary (inputs and outputs)**

| **Case** | **Modality** | **Original input (example)** | **Output (DICOM Part 10)** | **Key acquisition/voxel parameters** | **Derivatives (web)** |
| --- | --- | --- | --- | --- | --- |
| Hahoe-CR | CR | 1 CR image, 12,361×10,131 px, 16-bit | 1 file, CR Image Storage (Explicit VR Little Endian) | ImagerPixelSpacing (0018,1164) used | 1 JPEG derivative; 1 IIIF manifest |
| Hahoe-CT | CT | Single example slice (Instance #1177), 2048×2048 px | 1 file, CT Image Storage (Explicit VR Little Endian) | PixelSpacing = 0.155671 × 0.155671 mm; SliceThickness = SpacingBetweenSlices = 0.127204 mm; Rescale = (−1024, 1, HU) | 1 JPEG derivative; MPR snapshots; 1 IIIF manifest |

Note**.** Units are indicated by column headers. Input resolution and voxel spacing were transcribed from the tag spreadsheet, and deliverables counts follow the reproducibility bundle log.

**Table 6. X-ray acquisition parameters—CR (computed radiography)**

| **Parameter** | **Value** |
| --- | --- |
| Modality | CR |
| Manufacturer / Model | GE Inspection Technologies / CRxVision, Rhythm Review |
| Study/Series/Content Date | 2021‑08‑24 |
| kVp / Tube Current (mA) | 70 / 3 |
| Exposure (mAs) | 90 |
| Distance Source–Detector / Source–Patient (mm) | 1000 / 1000 |
| Imager Pixel Spacing (mm) | 0.035 × 0.035 |
| FilterType | NONE |
| Cassette Orientation / Size | PORTRAIT / 14IN×17IN |
| PlateType / PhosphorType | IPU / HR 35 µm |
| BodyPartExamined / ViewPosition | CHEST / PA |
| Rows × Columns | 12,361 × 10,131 |
| Bits Stored / Allocated / Representation | 16 / 16 / Signed(1) |
| Window Center / Width | 32768 / 65535 |
| Image Laterality | L |

**Table 7. X-ray acquisition parameters—CT (computed tomography)**

| **Parameter** | **Value** |
| --- | --- |
| Modality | CT |
| Rows × Columns | 2048 × 2048 |
| kVp / Tube Current (mA) | 90 / 200 |
| ExposureTime (ms) / Exposure (mAs) | 350 / 6 |
| Slice Thickness / Spacing Between Slices (mm) | 0.127204 / 0.127204 |
| In‑plane Pixel Spacing (mm) | 0.155671 × 0.155671 |
| Convolution Kernel | STANDARD |
| Patient Position | HFS |
| Image Orientation (patient) | 1, 0, 0, 0, −1, 0 |
| Image Position (patient) | −159.329, 159.329, −19.526 |
| Frame of Reference UID | 1.2.276.0.7230010.3.1.4.3719806279.3380.1645512104.8641 |
| Rescale Intercept / Slope / Type | −1024 / 1 / HU |
| Window Center / Width | 2317 / 68743 |
| Laterality | R |
| Acquisition Number / Instance Number | 1177 / 1177 |
| Table Feed per Rotation | 0.019531 |
| Parameter | Value |
| Modality | CT |
| Rows × Columns | 2048 × 2048 |
| kVp / Tube Current (mA) | 90 / 200 |
| ExposureTime (ms) / Exposure (mAs) | 350 / 6 |
| Slice Thickness / Spacing Between Slices (mm) | 0.127204 / 0.127204 |
| In‑plane Pixel Spacing (mm) | 0.155671 × 0.155671 |
| Convolution Kernel | STANDARD |
| Patient Position | HFS |
| Image Orientation (patient) | 1, 0, 0, 0, −1, 0 |
| Image Position (patient) | −159.329, 159.329, −19.526 |
| Rescale Intercept / Slope / Type | −1024 / 1 / HU |
| Window Center / Width | 2317 / 68743 |
| Laterality | R |
| Acquisition Number / Instance Number | 1177 / 1177 |
| Table Feed per Rotation | 0.019531 |

**Table 8. CT ROI and point measurements (grayscale and HU-formatted).**

| **ROI ID** | **Label** | **ROI_point(x, y)** | **ROI_px(W×H)** | **Mean (HU-formatted CT Number)** | **SD (HU-formatted CT Number)** | **Min** | **Max** | **N(px)** |
| --- | --- | --- | --- | --- | --- | --- | --- | --- |
| ROI‑1 | Air | (148, 140) | 64×64 | −1024.0 | 0.00 | −1024 | −1024 | 4096 |
| ROI‑2 | Background | (440, 496) | 64×64 | 975.8 | 0.30 | 975 | 976 | 4096 |
| ROI‑3 | Wood Core | (528, 808) | 64×64 | 983.6 | 0.4 | 982 | 985 | 4096 |
| ROI‑4 | Pigment | (668, 648) | 64×64 | 986.5 | 17.7 | 969 | 1137 | 4096 |
| ROI‑5 | Artifact | (1384, 992) | 64×64 | 968.1 | 14.4 | 900 | 1027 | 4096 |
| ROI‑6 | Artifact | (1304, 920) | 64×64 | 1042.1 | 34.4 | 995 | 1157 | 4096 |

Note**.** HU values are **HU-formatted CT numbers** derived via the medical baseline linear rescale (RescaleIntercept = −1024, Slope = 1). **As discussed in Section 5.4, these values are not calibrated for inter-material or inter-institutional comparison.** Full calibration metadata and uncertainty (phantom, kVp, kernel, slope/intercept used, ±SD, 95% CI) are recorded in HUCalibrationSequence (0013,14xx).

**Table 9. Consolidated dciodvfy results and vendor benchmark (same validator/options)**

| **Modality** | **DICOCH Errors** | **DICOCH Warnings** | **DICOCH Private notices*** | **Vendor Errors** | **Vendor Warnings** | **Notes (typical vendor issues)** |
| --- | --- | --- | --- | --- | --- | --- |
| CR | 0 | 0 | 146 | 23 | 10 | Missing Type 1/2/2C; UID mismatches; invalid VR/VM; attribute conflicts |
| CT | 0 | 0 | 157 | 5 | 10 | Conditional elements unmet; pixel-description conflicts; non-standard value forms |

Note**.** “Private notices” arise solely because the private dictionary (0013,xxxx) is not yet public; this is not a standards violation. The validator logs read: “Unrecognized tag — assuming explicit VR OK.”

**Table 10. Representative vendor error types and DICOCH handling policies**

| **Category** | **Typical dciodvfy message (vendor)** | **Impact** | **DICOCH handling (policy)** |
| --- | --- | --- | --- |
| Missing required attributes (Type 1/2/2C) | “Missing attribute Type 1/2/2C …” (e.g., ConversionType, PatientOrientation, Laterality) | Module integrity degraded; interpretation impossible | Enforce template population; abort generation if missing and log reason (P2) |
| UID mismatch | “MediaStorageSOPInstanceUID different from SOPInstanceUID” | File-meta vs. dataset identifier inconsistency | Generate a single UID and propagate; resynchronize during conversion (P1) |
| VR/VM non-conformance | “IS value invalid (decimal) …” (e.g., Exposure Time = 0.000000) | Parser/tool errors | Normalize unit/type (IS→DS), validate ranges, block via rule engine (P2) |
| Conflicting attributes | “PixelAspectRatio may not be present when ratio is 1:1,” etc. | Redundant reporting/conflict | Prefer PixelSpacing; remove AspectRatio (apply conditional rule) (P2) |
| Retired or dubious values | “PN Retired Person Name form / Value dubious …” | Interoperability warnings | Normalize to valid vocabulary/format (P2) |

**Table 11. The “Verification-First” Generation-Validation-Publication (GVP) Workflow Architecture**

| **Category** | **Generation** | **Validation** | **Publication** |
| --- | --- | --- | --- |
| Core Tool | Python/pydicom | dicom3tools (dciodvfy) | IIIF Presentation API 3.0 |
| Input | Raw Images + Metadata | Generated DICOM Object | Validated DICOM Object |
| Action | IOD Mapping & Private Tag Injection | Full Standard Compliance Check (Errors=0) | Manifest & Derivative Creation |
| Output | DICOM Part 10 File | Validation Log | IIIF JSON & Web Viewer Link |

**Table 12. Comparison of roles, scope, and extension strategies across medical (DICOM), industrial (DICONDE), and cultural heritage (DICOCH)**

| **Dimension** | **Medical (DICOM)** | **Industrial (DICONDE)** | **Cultural Heritage (DICOCH, this work)** | **What differs** | **Remedy / Recommendation** |
| --- | --- | --- | --- | --- | --- |
| Primary role / purpose | Clinical diagnosis; PACS storage; inter-institution exchange | NDE inspections for QA / acceptance; defect reporting | NDE for conservation, research, and exhibition; preservation DICOM + public IIIF | Cultural context and access policy are thin in DICOM/DICONDE | Maintain domain extension including context, rights, and public use cases |
| Scope / object of description | Patient–Study–Series centred | Equipment–process–defect centred | Object/collection centred with provenance, period, material, condition | Different identity and context hierarchies | Fix a hierarchical model for object ID, provenance, period, materials, condition |
| Data objects / modalities | CR/CT/MR/US, etc. | CT/CR and industrial formats for inspections | CR/CT plus ROI statistics and IIIF derivatives | Native web-derivative linkage is missing in DICOM/DICONDE | Make IIIF derivative & manifest generation a first-class workflow step |
| Extension strategy | Standard tags + vendor privates | DICOM-based profiles / guidance | DICOM-compatible; Private Group (0013,xxxx) for context, ROI/HU, IIIF, rights | DICOCH uses orthogonal augmentation (no overwrite) | Publish a public private-dictionary with versions; plan PS3.6 registration |
| Quantification (HU / ROI) | Clinical HU (Rescale); viewer tools | Thickness/defect metrics for decisions | HU monotonicity preserved; material-aware calibration (phantom/energy/kernel/water); machine-readable ROI stats | Cultural materials need energy-dependent calibration | Standardize HU calibration profiles, uncertainty, and applicability metadata |
| Validation / reproducibility | IOD + VR/VM conformance; vendor interoperability | Profile-driven documentation | Verification-first automation: generate → dciodvfy → IIIF (Errors=0 threshold) | Only DICOCH includes web-side validation | CI-style checklist: dciodvfy + DICOM viewer + IIIF viewer cross-checks |
| Rights / access policy | Patient privacy; identifiers | Corporate IP / trade protection | Copyright, holding institution, license (IIIF rights/provider), public tiers | Cultural rights/access are not modeled in DICOM/DICONDE | Schema a Security/Access sequence and provide policy templates |
| Web ecosystem linkage | PACS, viewers; some FHIR bridges | Reports / doc systems | IIIF Presentation 3.0 (zoom tiles, multilingual labels) | Direct DICOM→web UX bridge is lacking | Operate “one object—two interfaces (DICOM & IIIF)” with clear guidance |
| Governance / dictionary | DICOM WG; PS3.x | ASTM / industrial guides | Fixed Private Creator NRICH_DICOCH; public dictionary + exemplars | No official heritage dictionary | Public registry → Change Proposal (PS3.6) or published implementation profile |
| Tool-chain interoperability | Strong PACS/viewer support | Strong industrial tool focus | PACS compatible + commercial viewer check + IIIF (Mirador) verification | Museum/web interface is DICOCH’s strength | Maintain sample bundles and an integration test bench across PACS–Research–IIIF |
